**Full title: The nuclear RNAi factor, NRDE2, prevents the accumulation of DNA damage during mitosis in stressful growth conditions**

**Short Title: Heterochromatin associated proteins and DNA damage in mitosis**

Aarati Asundi<sup>1, 2</sup>, Srivats Venkataramanan<sup>1</sup>, Gina Caldas Cuellar<sup>3</sup>, Atsushi Suzuki<sup>4</sup>,  
Stephen N. Floor<sup>1</sup>, Andrei Goga<sup>1, 5, 6</sup>, Noelle L'Etoile<sup>1</sup>

1. Department of Cell and Tissue Biology, University of California, San Francisco, CA, USA
2. Biomedical Sciences Graduate Program, University of California, San Francisco, CA, USA.
3. Department of Molecular and Cell Biology, University of California, Berkeley, CA, United States.
4. Department of Oncology, Astellas, 2-5-1, Nihonbashi-Honcho, Chuo-ku, Tokyo 103-8411, Japan
5. Department of Medicine, University of California, San Francisco, CA, USA.
6. Helen Diller Family Comprehensive Cancer Center, University of California, San Francisco, CA, USA.

## 1 **Abbreviations**

2 PGC: Proliferative Germ Cell

3 NRDE-2: Nuclear RNAi Defective-2

4 AuBK: Aurora B Kinase

5 Mrt: Mortal germ line

6

## 7 **Abstract**

8 Organisms have evolved multiple mechanisms to prevent and repair DNA damage to  
9 protect the integrity of the genome, particularly under stressful conditions. Unrepaired  
10 DNA damage leads to genomic instability, aneuploidy, and an increased risk for cancer.  
11 Before the cell can divide, it must repair damaged DNA and it is thought that this  
12 process requires global silencing of most transcription. In *C. elegans*, NRDE-2, in complex  
13 with other nuclear factors and guided by small RNA, directs heterochromatin formation  
14 and transcriptional silencing of targeted genes. Additionally, when *C. elegans* are  
15 cultivated at high temperatures, NRDE-2 is required to maintain germ line immortality.  
16 However, the role of NRDE-2 in maintaining the physical integrity of the genome is not  
17 understood. We show here that loss of NRDE2 in either nematode or human cells  
18 induces the accumulation of DNA damage specifically under conditions of stress, such as  
19 cultivation at a high temperature in *C. elegans* or Aurora B Kinase oncogenic  
20 overexpression in the MCF10A epithelial breast cell line. In addition, we found that  
21 NRDE2 interacts with  $\beta$ -actin in unstressed mammalian cells. This interaction is  
22 dramatically reduced upon DNA damage. Monomeric nuclear actin binds to

23 heterochromatin remodeling factors and transcriptional activators while filamentous  
24 actin has been implicated in DNA repair processes. Thus, NRDE2 may dissociate from  
25 actin when it becomes filamentous as a result of DNA damage. In this way,  
26 heterochromatin factors may associate with the actin dependent DNA repair process to  
27 allow appropriate mitotic progression and maintain genomic integrity.

28

## 29 **Introduction**

30 Organisms have developed multiple ways to protect genomic integrity during mitotic  
31 cell division. Maintenance of the physical and informational integrity of the genome  
32 ensures that cells accurately transmit genetic information from one generation to the  
33 next, thereby safeguarding against diseases associated with genomic instability, such as  
34 cancer. Genomic instability is caused primarily through DNA damage. DNA damage can  
35 be incurred in a number of ways, including naturally during DNA replication, meiotic  
36 recombination, improper chromosome segregation, and transposable elements. DNA  
37 damage can also be caused by external sources such as UV irradiation or drugs. If the  
38 cell attempts to divide before the DNA is repaired, the unrepaired DNA damage can  
39 result in mitotic delay, aneuploidy, or apoptosis, which in turn can lead to disorders in  
40 the organism including cancer and infertility.

41 To protect against genomic instability, cells must fulfill a checkpoint at the Gap2 to  
42 Mitosis (G2/M) transition [46] at which the cell repairs any DNA damage sustained  
43 during the previous cell cycle phases. If the requirements of the G2/M checkpoint are

44 not satisfied, the cell will express a number of cell cycle inhibitors, leading to an arrest in  
45 G2. [30]

46 DNA repair is especially important in the germ line where strong evolutionary pressure  
47 to maintain the integrity of the genome of germ cells selects against harmful mutations.  
48 Thus, the germ line provides a window into how the environment affects the cell cycle.

49 The nematode *Caenorhabditis elegans* has a well-characterized germ line and  
50 reproductive cycle, which can be used to study the effects of improper mitosis on cell  
51 fate and fertility. The adult *C. elegans* gonad contains a stem cell niche, which  
52 mitotically proliferates to self-renew. These proliferating germ cells (PGCs) constitute  
53 the only pool of mitotically dividing cells in the adult worm. As the PGCs divide, they  
54 travel proximally along the gonad, where they transition from mitotic proliferation to  
55 meiotic division and ultimately differentiate into spermatozoa or oocytes. Therefore,  
56 maintaining mitotic integrity in the PGC pool is essential for ensuring the reproductive  
57 integrity of the animal.

58 Previous studies show that the number of PGCs is susceptible to internal molecular  
59 changes as well as external stresses, which can impact the worm's fertility. In addition to  
60 canonical signaling, such as the GLP-1/Notch, [31-32] DAF-7/TGFb [33] and IGF-1/insulin  
61 [34] pathways, many small RNA pathway proteins have also been extensively studied in  
62 the context of maintaining the PGC pool and fertility. For example, mutations in CSR-1  
63 (argonaute that binds endogenous 22G siRNAs)[36], EGO-1 (putative RdRP required for  
64 small RNA biosynthesis) [37, 38], DCR-1 (cleaves dsRNA) [39, 40] and EKL-1 (Tudor  
65 domain protein required in 22G RNA biosynthesis) [36, 41] have all been shown to have

66 significant mitotic and meiotic germ cell defects. Furthermore, external stresses such as  
67 starvation or changes in cultivation temperature can directly impact the PGC pool and  
68 subsequently affect fertility. [34, 35]

69 In particular, the nuclear RNAi protein, NRDE-2 is required to maintain reproductive  
70 integrity of *C. elegans* in response to environmental stress. *Nrde-2* null mutants remain  
71 fertile indefinitely at when grown under normal conditions at 20°C, however, when  
72 propagated at 25°C they produce fewer progeny each successive generation until  
73 becoming completely sterile by the fourth generation. [1, 16] This progressive sterility is  
74 termed a mortal germ line phenotype (Mrt). *Nrde-2* null mutant worms grown at 25°C  
75 also express high levels of repetitive RNA as compared to wild type worms propagated  
76 under the same conditions. This is consistent with the hypothesis that NRDE-2 acts to  
77 silence transposons and repress repetitive sequences, [16, 47] which are naturally  
78 occurring DNA damaging agents and can affect the informational and physical integrity  
79 of the genome.

80 We and others have hypothesized that the Mrt phenotype seen in *C. elegans* mutants  
81 lacking heterochromatin factors, piRNA, or nuclear RNAi factors, including NRDE-2,  
82 might result from accumulated DNA damage in the germ line. [47] The function of  
83 NRDE-2 in preventing DNA damage accumulation seems to be conserved across species  
84 but had not been directly studied in the *C. elegans* germ line. In the fission yeast, *S.*  
85 *pombe*, loss of the NRDE-2 homolog (known as *nrl1*) results in increased DNA damage,  
86 which was posited to arise from unresolved R-loops. [17] R-loops are RNA-DNA hybrids  
87 that arise from transcription of repetitive elements in which the RNA message invades

88 the double stranded DNA helix. The DNA-RNA hybrid is more stable than the DNA-DNA  
89 hybrid and can cause DNA damage when the replication fork collides with it.  
90 Transcriptional silencing of repetitive elements by heterochromatin factors such as  
91 NRDE2 was thought to prevent the possibility of R-loop formation. [48] A recent study in  
92 HEK293 (human embryonic kidney) cells, however, showed the human homolog of  
93 NRDE-2 (known as NRDE2 or C14orf102) plays a role in DNA damage response and  
94 preventing the accumulation of double stranded breaks, independently of R-loop  
95 formation and resolution. [22] Thus, NRDE2 may act in its capacity as a heterochromatin  
96 factor to repress transcription of repetitive elements to limit both R-loop formation and  
97 transposition, which are two events that pose threats to the integrity of the genome.  
98 Recently, it has been increasingly appreciated that heterochromatic regions of the  
99 genome (nuclear speckles) are associated with monomeric actin and that  
100 heterochromatin remodelers such as SWI/SNF , SWR1 and INO80 are tightly bound to  
101 actin monomers and this association is important for their ability to bind to chromatin.  
102 [45] Thus, stressors such as high temperature and DNA damage have been shown to tilt  
103 the balance of nuclear actin from monomeric to filamentous, which has been shown to  
104 be required for efficient DNA damage repair. [25] How heterochromatin associated  
105 factors and nuclear actin polymerization status are linked, however, remains unclear.  
106 In this paper, we show evidence that NRDE2 prevents the accumulation of DNA damage  
107 particularly under conditions of stress in proliferating cell populations. In the *C. elegans*  
108 germ line, NRDE-2 loss resulted in the accumulation of DNA damage only when the  
109 worms were propagated at a high temperature. This correlated with a decrease in the

110 number of PGCs and was consistent with the previously reported Mrt phenotype.  
111 Moreover, in human cells, we found that NRDE2 loss did not significantly impact the  
112 proliferation of normal epithelial breast cells MCF10A unless they overexpress the  
113 oncogene Aurora B Kinase (AubK). In these cells, we observed a delay in mitotic  
114 prophase as well as an increase in DNA damage. This indicates that NRDE2 may have a  
115 role protecting against DNA damage accumulation. Finally, we observed a strong  
116 protein-protein interaction between NRDE2 and  $\beta$ -actin in normally proliferating  
117 MCF10A cells, which was weakened upon the introduction of DNA damaging agents.  
118 Thus, we suggest a novel link between this heterochromatin factor, actin, and DNA  
119 repair.

120

## 121 **Results**

### 122 Loss of NRDE-2 coupled with propagation at high temperature incurs DNA damage in the 123 mitotic zone of the *C. elegans* gonad

124 Previous studies in *C. elegans* have shown that loss of NRDE-2 does not affect germ line  
125 immortality when the worms are propagated at 20°C. We have observed that although  
126 *nrde-2 (gg91)*, null mutants remain fertile indefinitely when cultivated at 20°C, these  
127 worms have a lower brood size as compared to wild type (Fig S1,  $p=0.0148$ ,  $n=4$ ). In  
128 contrast, if the worms are cultivated at 25°C, a more stressful temperature, *nrde-2*  
129 (*gg91*) mutants exhibit a Mrt phenotype that increases in severity with each successive  
130 generation.[1] We asked whether the decrease in brood size of *nrde-2 (gg91)* mutant  
131 worms was a result of physiological defects in the gonad. We observed a significant

132 decrease in the number of proliferating germ cells (PGCs) in the mitotic zone in *nrde-2*  
133 (*gg91*) worms propagated at 20°C as compared to wild type (Fig 1A and B, left,  
134  $p=0.0115$ ). When we propagated the worms at the stressful temperature of 25°C for 2  
135 generations (G2), we found that the number of PGCs was significantly decreased as  
136 compared to wild type G2 worms grown at 25°C (Fig 1A and B, left,  $p<0.0001$ ).  
137 Since the Mrt phenotype in *nrde-2 (gg91)* mutants depends on cultivation at 25°C, we  
138 asked whether the cells accumulated DNA damage at this temperature, which would  
139 ultimately cause sterility. We used immunofluorescence to stain for RAD-51, a marker of  
140 DNA damage repair, and found that *nrde-2 (gg91)* G2 worms grown at 25°C had  
141 significantly increased RAD-51 foci in the mitotic zone as compared to wild type G2  
142 worms grown at the same temperature (Fig 1A and B, right,  $p<0.0001$ ). We then asked  
143 whether the aberrant accumulation of DNA damage in the mitotic PGCs resulted in  
144 defects as the cells entered meiosis in the proximal gonad and progressed towards  
145 oocyte formation. We expressed the apoptotic cell corpse marker, CED-1::GFP, which  
146 labels apoptotic cell corpses in the proximal loop of the gonad, in *nrde-2 (gg91)* mutants  
147 and wild type worms. We found that when the worms were propagated at 20°C, *nrde-2*  
148 (*gg91*) mutants showed a similar number of CED-1::GFP labeled germ cell corpses as  
149 wild type worms. However, *nrde-2 (gg91)* G1 and G2 worms showed increased numbers  
150 of CED-1::GFP labeled germ cell corpses as compared to wild type G1 and G2 worms,  
151 respectively (Figure 1C and D,  $p<0.0001$  for both).  
152 We conclude that when worms are cultivated at a normal, non-stressful temperature,  
153 loss of NRDE-2 has minor enduring impacts on fertility and integrity of the *C. elegans*



154 germ line. However, when NRDE-2 loss is coupled with an external stress, such as a high  
155 cultivation temperature, the DNA damage and subsequent cell death in the gonad  
156 compounds over the generations, ultimately resulting in sterility. Therefore, we  
157 propose the NRDE-2 may have a role in preventing DNA damage accumulation in the  
158 mitotic PGCs in order to maintain integrity of the *C. elegans* germ line.

159

160 Loss of NRDE2 coupled with Aurora B Kinase overexpression in MCF10A cells results in  
161 DNA damage accumulation

162 To gain a biochemical and cell biological understanding of the role of NRDE-2, we  
163 decided to utilize the actively dividing MCF10A cell line. MCF10A cell are a normal  
164 human epithelial cell line derived from reduction mammoplasty. [4]  
165 We used a lentiviral vector to stably express an eGFP-tagged version of human NRDE2 in  
166 the MCF10A cells. The eGFP::NRDE2 localized to puncta within the nucleus (Fig 2Ai).  
167 These puncta were reminiscent of staining of heterochromatin and heterochromatin  
168 associated factors. [49] Once the cell entered prophase, as characterized by chromatin  
169 condensation, the eGFP signal became diffuse and remained so throughout mitosis (Fig  
170 2Aii-v) until cytokinesis, when eGFP::NRDE2 seemed to re-localize to puncta in the  
171 nuclei of the daughter cells (Fig 2Avi). The dynamics of this pattern of staining is similar  
172 to that of human RNA pol II transcription machinery proteins TBP (TATA box-binding  
173 protein) and TAF12 (TATA box-binding protein associated factor 12) in HeLa cells. [29]  
174 These data are therefore consistent with a conserved role for NRDE2 as a transcriptional  
175 regulator in human cells.

176 We wanted to further test the hypothesis that NRDE-2 regulates DNA damage and  
177 mitosis under stressful conditions. We therefore created a mitotically stressed MCF10A  
178 cell line by stably overexpressing an HA-tagged version of the oncogene Aurora B kinase  
179 (AuBK OE) in eGFP::NRDE-2 expressing cells. AuBK is a master regulator of mitotic  
180 events, including chromatin condensation during prophase, [5] microtubule-kinetochore  
181 attachment during metaphase, [6], [7] and abscission during cytokinesis. [8] Loss of this  
182 regulation has been linked to genetic instability, which results in aneuploidy, a key  
183 hallmark of cancer. Accordingly, AuBK over-expression has been linked to many cancer  
184 types and correlates with poor prognosis for patients. [11-12] The localization of  
185 eGFP::NRDE2 in AuBK OE MCF10A cell lines throughout the cell cycle was identical to  
186 that of eGFP::NRDE2 in control cells (Fig 2A vii and xii).

187 Consistent with AuBK's role in mediating chromatin condensation at the G2/M  
188 transition, AuBK OE MCF10A cells showed increased levels of phosphorylated Histone  
189 H3 (Fig 2B, middle,  $p=0.0337$ ,  $n=4$ ), a known target of Aurora B Kinase. We also  
190 observed a significant increase in  $\gamma$ H2AX (H2AX phosphorylation on S139), a common  
191 marker of DNA damage (Fig 2B, right,  $p=0.015$ ,  $n=5$ ). Therefore, we utilized AuBK  
192 overexpression as a tool to study the effects of NRDE2 loss on DNA damaged cells.

193 Next, we assessed the efficacy of using NRDE2 targeted siRNA as a tool to knockdown  
194 NRDE2 in MCF10A cells. We observed that cells treated with NRDE2 siRNA showed >90%  
195 decrease in eGFP::NRDE2 expression as compared to cells treated with a non-targeting  
196 siRNA control (Fig 2C). We then asked whether the amount of DNA damage in control or  
197 AuBK OE cells was altered upon NRDE2 knockdown. Interestingly, we found when

198 control cells were treated with NRDE2 siRNA, there was no increase in  $\gamma$ H2AX as  
199 compared to control cells treated with non-targeting siRNA (Fig S3,  $p=0.11$ ,  $n=5$ ).  
200 However, loss of NRDE2 in AuBK OE cells resulted in increased DNA damage as  
201 compared to AuBK OE cells treated with non-targeting siRNA (Fig 2D,  $p=0.048$ ,  $n=5$ ). We  
202 conclude that loss of NRDE2 has a minimal effect on DNA damage in normally  
203 proliferating cells. However, in AuBK OE cells, which show an increased basal level of  
204 DNA damage, loss of NRDE2 further increases the accumulation of DNA damage.

205

206 *Loss of NRDE2 coupled with Aurora B Kinase overexpression in MCF10A cells results in*  
207 *mitotic delay*

208 We asked whether the increase in DNA damage observed in the AuBK OE cells upon  
209 NRDE2 loss would result in an observable change in mitotic cell proliferation. We  
210 observed that when AUBK OE cells were treated with NRDE2 siRNA, there was a  
211 decrease in overall metabolic cell activity in the culture (Fig S2) and a significant increase  
212 in the number of rounded cells (Fig 3A). Cells commonly round up due to a stall in  
213 mitosis or when the cell is about to undergo apoptosis, both of which could explain the  
214 observed decrease in metabolic cell activity. To differentiate between these two  
215 possibilities, we used live cell imaging to record cell growth after NRDE2 knockdown. We  
216 found that AuBK OE cells treated with non-targeting siRNA took a longer time to  
217 complete mitosis than control cells. Furthermore, when AuBK OE cells were treated with  
218 NRDE2 siRNA, there was a significant increase in the average time through mitosis (Fig  
219 3B and C). However, we also noticed that a small proportion of AUBK-overexpressing

220 cells required a significantly longer time to complete mitosis upon NRDE2 siRNA  
221 treatment (Fig 3B and C). The rounded morphology of the cells, the compaction of the  
222 chromatin and the concentration of the DNA at the cell center, indicated that this stall  
223 may occur during the early stages of mitosis.

224 We propose that the rounded cells observed upon NRDE2 knockdown in AUBK-  
225 overexpressing cells is due to a delay in mitosis. To further characterize this delay, we  
226 calculated the mitotic index of these cells. Consistent with the time lapse data, we found  
227 that AuBK OE cells had a higher mitotic index than control cells. However, we found no  
228 significant difference between the mitotic index of non-targeting siRNA treated cells and  
229 the NRDE2 siRNA treated cells in either the control or AuBK OE (Fig S4). We surmised  
230 that this could be due to the fact that the percentage of cells with a significant delay in  
231 mitosis is so low that these cells were not sufficient to affect the mitotic index.

232 We next asked whether we could identify the stage at which mitosis was delayed in  
233 AUBK-OE cells. We quantified the number of cells in each stage of mitosis in a fixed  
234 population of cells and found more cells in prophase upon NRDE2 knock down (Fig 3E p=  
235 0.025, n=4). This is also consistent with the time lapse analysis of AuBK OE cells delayed  
236 in early mitosis (Fig 3C) leading us to conclude that the delay seen in NRDE2 knockdown  
237 AUBK-overexpressing cells may be occurring at prophase.

238

239 Mammalian NRDE2 interacts with  $\beta$ -actin in healthy, normally proliferating cells, and  
240 this interaction is weakened upon DNA damage

241 Our finding that NRDE2 specifically mitigates DNA damage accumulation in sensitized or  
242 stressed cell populations led us to ask whether NRDE2 interacts with different partners  
243 under these conditions. We decided to probe this question using co-  
244 immunoprecipitation experiments, using an anti-GFP antibody to detect eGFP::NRDE2 in  
245 MCF10A lysates (Fig 4A and Fig S5).

246 In *C. elegans*, NRDE-2 interacts with other nuclear RNAi factors NRDE-1 and NRDE-4, as  
247 well as the worm specific argonaute NRDE-3. [11] In contrast, NRDE2 does not interact  
248 with other RNAi factors in *S. pombe* yeast cells or in human cells. [22, 43, 44] Consistent  
249 with these findings, we saw no interaction between eGFP::NRDE2 and any of the known  
250 human Argonautes AGO-1/2/3/ or -4 (Fig S6).

251 Interestingly, we observed a strong interaction between NRDE2 and  $\beta$ -actin in control  
252 cells (Fig 4A). Furthermore, this interaction seemed to be weakened in AuBK OE cells  
253 (Fig 4A and B,  $p=0.036$ ,  $n=5$ ). These results may suggest an interesting function for  
254 NRDE2 in DNA damaged cells. Nuclear actin forms filaments upon DNA damage to aid in  
255 repair. [25] Since AuBK overexpression increases DNA damage in MCF10A cells, we  
256 hypothesized that the interaction between NRDE2 and  $\beta$ -actin may be weakened in  
257 these cells due to the nuclear actin forming filaments in response to DNA damage. To  
258 test whether DNA damage altered the interaction between NRDE2 and  $\beta$ -actin, we  
259 treated the cells with cisplatin, a DNA damaging reagent. In both control and AuBK  
260 overexpressing MCF10A cells, the interaction between NRDE2 and  $\beta$ -actin was reduced  
261 as compared to untreated cells (Fig 4A and B,  $p=0.045$ ,  $n=3$ ). Therefore, we propose that  
262 NRDE2 interacts with  $\beta$ -actin only when the DNA is intact. However, when DNA damage

263 in induced by stressors such as AuBK over-expression or the presence of cisplatin, the  
264 interaction between NRDE2 and  $\beta$ -actin is disrupted, perhaps as a result of the nuclear  
265 actin forming filaments to aid in DNA repair.

266

## 267 **Discussion**

268 This study describes a previously uncharacterized role for NRDE2, a putative nuclear  
269 RNA-binding protein, in protecting against DNA damage in stressed cells. Our study is  
270 the first to study the effect of NRDE2 loss in normal, unstressed cells as compared to in  
271 stressed cells. We have also shown that this protective role for NRDE2 in stressed cells is  
272 conserved in *C. elegans* and mammalian mitotic cells.

273 Previously, NRDE2 was described to protect against the accumulation of DNA damage,  
274 as assessed by an increase in  $\gamma$ H2AX levels upon NRDE2 loss in HEK293 cells. [22] We  
275 believe this is consistent with our results as HEK293 cells are not a normally proliferating  
276 cell line. The HEK293 line was originally obtained by transforming human embryonic  
277 kidney cells with human adenovirus type 5, resulting in a 4.5kb insertion of a viral  
278 fragment in chromosome 19 which interferes with cell death and cell cycle control  
279 pathways. [23] HEK293 cells are also hypotriploid, [24] which may further affect mitosis.  
280 Consistent with this point, we found that NRDE2 knockdown resulted in an increase of  
281  $\gamma$ H2AX levels only in AuBK-overexpressing MCF10A cells, not in the normal, unstressed  
282 control cells. Since AuBK overexpressing causes an increase in basal levels of DNA  
283 damage, we propose that NRDE2 in mammalian cells results in an accumulation of DNA

284 damage only in cells with increases mitotic stress, similar to the results seen in *C.*  
285 *elegans*.  
286  
287 In *C. elegans*, loss of NRDE-2 alone does not seem to severely compromise the mitotic  
288 PGCs or brood size, as evidenced by the worms remaining indefinitely fertile and  
289 exhibiting relatively normal development. Upon the addition of a stressful 25°C  
290 cultivation temperature, however, there is a drastic reduction in the number of PGCs  
291 and brood size. Under these stressful conditions, DNA damage accumulates in the germ  
292 cells, presumably resulting in the previously observed Mrt phenotype. This trans-  
293 generational Mrt phenotype is similar to fertility defects observed *rsd-2* and *rsd-6* RNAi  
294 spreading defective mutants. RSD-2 and RSD-6, along with NRDE-2 were proposed to  
295 induce genome wide epigenetic silencing to maintain germ cell immortality and fertility.  
296 RSD-2 and RSD-6 are also thought to act in a different pathway than the 22G-RNA  
297 associating argonautes CSR-1 and ALG3/4, which display Mrt phenotypes due to defects  
298 in spermatogenesis. [16] The effect of NRDE-2 loss on spermatogenesis remains unclear.  
299  
300 The defects seen in *nrde-2 (gg91)* mutants may also be due to improper chromatin  
301 condensation and chromosome segregation. It has been previously reported that CSR-1  
302 is required for the localization of CDE-1, a nucleotidyltransferase protein that is  
303 responsible for the uridylation of siRNAs bound by CSR-1, to mitotic chromosomes in  
304 embryos. [19] Loss of CDE-1 results in an accumulation of siRNAs and improper gene  
305 silencing, as well as mitotic and meiotic chromosome segregation defects. NRDE-2, by

306 contrast, associates with other NRDE pathway proteins to recruit methyltransferases  
307 MES-2 and SET-25, which direct the deposition of methylation marks to silence loci  
308 targeted by siRNAs. [20-21] Therefore, NRDE-2 loss may also result in improper gene  
309 silencing in the *C. elegans* germ line, resulting in mitotic defects, which are exacerbated  
310 by the stress of high temperature.

311

312 Interestingly, we observed a strong association between NRDE2 and  $\beta$ -actin in MCF10A  
313 cells that was diminished upon DNA damage causing agents. Since NRDE2 localizes to  
314 puncta in the interphase nucleus, we hypothesize that NRDE2 likely interacts with  
315 nuclear actin. One potential model for this interaction is that NRDE2 binds to  
316 monomeric nuclear actin in the unstressed cell. Monomeric nuclear actin associates  
317 with chromatin remodeling complexes, and might be involved in chromatin binding. [45]  
318 However, upon DNA damage, nuclear actin assembles into filaments and promotes DNA  
319 damage repair. [25] NRDE2 may be displaced or unable to bind to filamentous actin, and  
320 as a result, show a weakened interaction on  $\beta$ -actin upon DNA damage. It is still unclear  
321 whether NRDE-2 functions in preventing the formation of DNA damage or as a  
322 chromatin associated sensor of DNA damage in the  $\beta$ -actin dependent DNA repair  
323 pathway. Further study is needed to characterize the function of NRDE2, and possibly  
324 other heterochromatin factors, in preventing DNA damage accumulation and  
325 maintaining genomic stability. The interaction between NRDE2 and  $\beta$ -actin is especially  
326 exciting as it may indicate a new mechanistic role for NRDE2 in the nucleus beyond gene  
327 silencing and epigenetic inheritance.



328

## 329 **Materials and Methods**

### 330 *C. elegans* strains

331 All strains were cultured on Nematode Growth Medium (NGM) plates seeded with *E.*  
332 *coli* OP50. Bristol N2 was the wild type strain used. Loss of NRDE-2 was studied using the  
333 mutant allele *nrde-2 (gg91)*. Worms were crossed into a strain expressing *ced-1p::GFP+*  
334 *lin-15 (+)* to study apoptotic cells.

335

### 336 Gonad Staining

337 Gonads were dissected from young adults (24 hours post-L4 stage) in 1xEGG buffer  
338 (25mM HEPES, pH7.3; 118mM NaCl, 48mM KCl, 2mM CaCl<sub>2</sub>, 2mM MgCl<sub>2</sub>) and fixed in  
339 2% (final concentration) formaldehyde. The following primary antibodies were used:  
340 rabbit anti-RAD-51 and chicken anti-HTP-3. Fixed gonads were imaged with exposure  
341 times of 100ms with DAPI, GFP, TRITC, and CY5 filter cubes and a mercury arc lamp on a  
342 Zeiss AxioPlan2 epifluorescence microscope (operated by MicroManager 1.4.13) with a  
343 60x 1.3 DIC oil objective and a QIClick camera (QImaging). Images were recorded with  
344 a Z-optical spacing of 2 μm and analyzed using the Image J software.

345

### 346 Progeny Assay

347 Sixteen L4-staged worms were individually placed on a 5cm NGM plate with *op50*. Every  
348 24 hours, the worm was moved to a fresh plate for 10 consecutive days. 48 hours after

349 the original worm was removed from the plate, the number of living progeny was  
350 counted.

351

### 352 Cell Culture

353 MCF10A cells lines expressed a vector conferring puromycin/ blastocystin antibiotic  
354 resistance that was empty (control) or that drove the overexpression of Aurora B Kinase  
355 (AuBK OE). MCF10A cells were maintained in Dulbecco's modified Eagle's medium/F-12,  
356 phenol red free medium supplemented with 5% heat inactivated horse serum, 20 ng/ml  
357 recombinant EGF (Invitrogen), 0.5 µg/ml hydrocortisone (Sigma), 100 ng/ml cholera  
358 toxin (Sigma), and 10 µg/ml insulin (Sigma). U2OS cells were maintained using  
359 Dulbecco's modified Eagle's medium with phenol red supplemented with 10% FBS.

360

### 361 siRNA knockdown

362 We used the following Thermo Scientific siRNAs: siGENOME Non-Targeting siRNA  
363 Pool#2 (D-001206-14-20), siGENOME Human NRDE2 (55051) siRNA- SMARTpool (M-  
364 013794-00-0005). siRNAs were added to the cell culture at a final concentration of 5nM  
365 in OPTIMEM Reduced Serum Media with Lipofectamine 2000 Reagent (1ug/ml final  
366 concentration) (Invitrogen) for 24 hours. Cells were then washed 1x with PBS and fresh  
367 MCF10A media was added. 48 hours after changing media, the cells were harvested for  
368 analysis.

369

### 370 Western Blot

371 Cultured cells were homogenized in Laemmli Buffer (60 mM Tris–HCl pH 7.6, 2% SDS,  
372 1mM DTT) containing COMPLETE protease inhibitor cocktail (Roche #118361700001)  
373 and phosphatase inhibitors (Santa Cruz Biotechnology)). Protein concentrations were  
374 determined by performing DC Protein Assay (Bio-Rad) using BSA as standard. Protein  
375 extracts were resolved using Bolt 4%-12% Bis-Tris PAGE gels (Invitrogen) with 1x MES  
376 SDS Running Buffer (Life Technologies). Transfer to nitrocellulose membranes (Life  
377 Technologies) was performed on an iBlot apparatus (Invitrogen). Membranes were  
378 probed with primary antibodies overnight on a 4°C shaker and then incubated with  
379 horseradish peroxidase (HRP)-conjugated secondary antibodies, and signals were  
380 visualized with ECL (Bio-Rad) or Visualizer Western Blot Detection Kit, rabbit (Millipore).

381 The following primary antibodies were used: GFP (Rockland, 600-101-215), phospho-  
382 Histone H3 (Ser10) (Cell Signaling Technologies, #9701), phospho-Histone H2A.X (Ser  
383 139) (Cell Signaling Technologies, #9718), HA-tag (Cell Signaling Technologies #2367),  
384 PARP (Cell Signaling Technologies, #9542),  $\beta$ -actin HRP (Santa Cruz Biotechnology, sc-  
385 47778)

386

### 387 Cell Immunofluorescence

388 Cells were grown on a sterilized glass coverslip (Fisherbrand). After siRNA treatment, the  
389 cells were fixed with ice cold 100% methanol for 3 minutes at -20°C and rehydrated with  
390 TBST (1xTBS, 0.1% Tween 20). Antibodies were made up in blocking solution (2gBSA  
391 powder, 0.1g NaN<sub>3</sub>, 100mL TBST). The following primary antibodies were used: human  
392 anti-centromere (CREST, 1:50, Antibodies Incorporated 15-234) mouse anti- $\alpha$ -tubulin

393 (DM1a, 1:1000, Sigma T6199), rabbit anti-g-tubulin (1:1000, Sigma T3559). Cells were  
394 mounted with Vectashield Mounting Medium with DAPI (Vector Laboratories H-1200).  
395

#### 396 Time lapse Imaging

397 MCF10A cells expressing H2B::mCherry were imaged at 37°C with a 100x NA 1.49  
398 objective lens (CFI APO TIRF; Nikon) on an inverted microscope system (TE2000 Perfect  
399 Focus System; Nikon) equipped with a Borealis modified spinning disk confocal unit  
400 (CSU10; Yokogawa) with 200-mW, 405 nm, 488 nm, 561 nm and 643 nm solid-state  
401 lasers (LMM5; Spectral Applied Research), electronic shutters, a Clara cooled scientific-  
402 grade interline CCD camera (Andor), and controlled by NIS-Elements software (Nikon).  
403

#### 404 Co-Immunoprecipitation

405 Cells were collected and lysed in cold lysis buffer (150mM NaCl/ 1.0% IGEPAL/ 50mM  
406 Tris-Cl (pH 7.4)) containing Complete protease inhibitor cocktail (Roche, 118361700001)  
407 by nutating at 4°C for 30 minutes. The lysate was spun at 14K G, and supernatant was  
408 transferred to a new tube, and cleared using 50ul of Dynabeads Protein A (Invitrogen,  
409 10001D). Pre-cleared lysate was removed from the beads using magnetic separation  
410 (input sample was collected at this stage), added to 5 ul of anti-GFP antibody (Rockland,  
411 600-101-215), and nutated at 4°C for 2 hours. Antibody-protein complexes were  
412 isolated by the addition of Dynabeads Protein A (Invitrogen, 10001D), overnight  
413 nutation and magnetic separation. The beads were washed with the lysis buffer

414 containing protease inhibitors five times. IP western blot bands were normalized to 5%  
415 sample input.

416

#### 417 **Acknowledgements**

418 Thanks to Dr. Scott Kennedy for providing the nrde-2 (gg91) strain and to Dr. Needhi  
419 Bhalla (UC Santa Cruz) for providing the CED-1::GFP strain. We would like to thank Dr.  
420 Gina Caldas (Dernburg lab at UC Berkeley) for reagents and advice about *C. elegans*  
421 gonad immunofluorescence staining. We extend a special thanks to Christina Hueschen  
422 (Dumont lab at UCSF) for creating a nuclear GFP quantification MatLab script. We would  
423 also like to thank Dr. Sophie Dumont and Dr. Torsten Wittmann (UCSF) for use of their  
424 microscopes and advice regarding imaging and the cell cycle.

425

#### 426 **Funding**

427 Noelle L'Etoile and Andrei Goga are supported in part through funds from the National  
428 Institutes of Health Research Program—Cooperative Agreements (U19CA179512-05S2).  
429 Dr. Andrei Goga and Aarati Asundi is also receive funding support from the CDMRP BCRP  
430 (W81XWH-12-1-0272) and NIH (U19CA179512). Dr. Stephen N. Floor and Dr. Srivats  
431 Venkataramanan are supported by funds from the California Tobacco-Related Disease  
432 Research Grants Program Office of the University of California, 27KT-0003 and the  
433 Program for Breakthrough Biomedical Research, which is partially funded by the Sandler  
434 Foundation. Dr. Gina Caldas Cuellar is supported by the PEW Latin American  
435 Fellow program and the Damon Runyon Fellowship.

436

437 **References**

438 [1] Buckley BA, Burkhart KB, Gu SG, Spracklin G, Kershner A, Fritz H, Kimble J, Fire A,

439 Kennedy S. A nuclear Argonaute promotes multigenerational epigenetic inheritance and

440 germline immortality. *Nature*. 2012 Sep 20;489(7416):447-51. doi:

441 10.1038/nature11352.

442

443 [2] Burton NO, Burkhart KB, Kennedy S. Nuclear RNAi maintains heritable gene silencing

444 in *Caenorhabditis elegans*. *Proc Natl Acad Sci U S A*. 2011 Dec 6;108(49):19683-8. doi:

445 10.1073/pnas.1113310108.

446

447 [3] Zhou Z, Hartwig E, Horvitz HR. CED-1 is a transmembrane receptor that mediates

448 cell corpse engulfment in *C. elegans*. *Cell*. 2001 Jan 12;104(1):43-56.

449

450 [4] Soule HD, Maloney TM, Wolman SR, Peterson WD Jr, Brenz R, McGrath CM, Russo J,

451 Pauley RJ, Jones RF, Brooks SC. Isolation and characterization of a spontaneously

452 immortalized human breast epithelial cell line, MCF-10. *Cancer Res*. 1990 Sep

453 15;50(18):6075-86.

454

455 [5] Goto H, Yasui Y, Nigg EA, Inagaki M. Aurora-B phosphorylates Histone H3 at serine28

456 with regard to the mitotic chromosome condensation. *Genes Cells*. 2002 Jan;7(1):11-7.

457

- 458 [6] Lampson MA, Grishchuk EL. Mechanisms to Avoid and Correct Erroneous  
459 Kinetochore-Microtubule Attachments. *Biology (Basel)*. 2017 Jan 5;6(1). pii: E1. doi:  
460 10.3390/biology6010001.  
461
- 462 [7] Welburn JP, Vleugel M, Liu D, Yates JR 3rd, Lampson MA, Fukagawa T, Cheeseman  
463 IM. Aurora B phosphorylates spatially distinct targets to differentially regulate the  
464 kinetochore-microtubule interface. *Mol Cell*. 2010 May 14;38(3):383-92. doi:  
465 10.1016/j.molcel.2010.02.034.  
466
- 467 [8] Steigemann P, Wurzenberger C, Schmitz MH, Held M, Guizetti J, Maar S, Gerlich DW.  
468 Aurora B-mediated abscission checkpoint protects against tetraploidization. *Cell*. 2009  
469 Feb 6;136(3):473-84. doi: 10.1016/j.cell.2008.12.020.  
470
- 471 [9] Fell VL, Walden EA, Hoffer SM, Rogers SR, Aitken AS, Salemi LM, Schild-Poulter C.  
472 Ku70 Serine 155 mediates Aurora B inhibition and activation of the DNA damage  
473 response. *Sci Rep*. 2016 Nov 16;6:37194. doi: 10.1038/srep37194.  
474
- 475 [10] Monaco L, Kolthur-Seetharam U, Loury R, Murcia JM, de Murcia G, Sassone-Corsi P.  
476 Inhibition of Aurora-B kinase activity by poly(ADP-ribosyl)ation in response to DNA  
477 damage. *Proc Natl Acad Sci U S A*. 2005 Oct 4;102(40):14244-8.  
478

- 479 [11] Guang S, Bochner AF, Burkhart KB, Burton N, Pavelec DM, Kennedy S. Small  
480 regulatory RNAs inhibit RNA polymerase II during the elongation phase of transcription.  
481 Nature. 2010 Jun 24;465(7301):1097-101. doi: 10.1038/nature09095.  
482
- 483 [12] Chieffi P. Aurora B: A new promising therapeutic target in cancer. Intractable Rare  
484 Dis Res. 2018 May;7(2):141-144. doi: 10.5582/irdr.2018.01018.  
485
- 486 [13] Tang A, Gao K, Chu L, Zhang R, Yang J, Zheng J. Aurora kinases: novel therapy  
487 targets in cancers. Oncotarget. 2017 Apr 4;8(14):23937-23954. doi:  
488 10.18632/oncotarget.14893.  
489
- 490 [14] Zuazua-Villar P, Rodriguez R, Gagou ME, Eysers PA, Meuth M. DNA replication stress  
491 in CHK1-depleted tumour cells triggers premature (S-phase) mitosis through  
492 inappropriate activation of Aurora kinase B. Cell Death Dis. 2014 May 22;5:e1253. doi:  
493 10.1038/cddis.2014.231.  
494
- 495 [15] Kabeche L, Nguyen HD, Buisson R, Zou L. A mitosis-specific and R loop-driven ATR  
496 pathway promotes faithful chromosome segregation. Science. 2018 Jan  
497 5;359(6371):108-114. doi: 10.1126/science.aan6490.  
498
- 499 [16] Sakaguchi A, Sarkies P, Simon M, Doebley AL, Goldstein LD, Hedges A, Ikegami K,  
500 Alvares SM, Yang L, LaRocque JR, Hall J, Miska EA, Ahmed S. *Caenorhabditis elegans*



501 RSD-2 and RSD-6 promote germ cell immortality by maintaining small interfering RNA  
502 populations. Proc Natl Acad Sci U S A. 2014 Oct 14;111(41):E4323-31. doi:  
503 10.1073/pnas.1406131111.  
504  
505 [17] Aronica L, Kasperek T, Ruchman D, Marquez Y, Cipak L, Cipakova I, Anrather D,  
506 Mikolaskova B, Radtke M, Sarkar S, Pai CC, Blaikley E, Walker C, Shen KF, Schroeder R,  
507 Barta A, Forsburg SL, Humphrey TC. The spliceosome-associated protein Nrl1 suppresses  
508 homologous recombination-dependent R-loop formation in fission yeast. Nucleic Acids  
509 Res. 2016 Feb 29;44(4):1703-17. doi: 10.1093/nar/gkv1473.  
510  
511 [18] Conine CC, Moresco JJ, Gu W, Shirayama M, Conte D Jr, Yates JR 3rd, Mello CC.  
512 Argonautes promote male fertility and provide a paternal memory of germline gene  
513 expression in *C. elegans*. Cell. 2013 Dec 19;155(7):1532-44. doi:  
514 10.1016/j.cell.2013.11.032.  
515  
516 [19] van Wolfswinkel JC, Claycomb JM, Batista PJ, Mello CC, Berezikov E, Ketting RF.  
517 CDE-1 affects chromosome segregation through uridylation of CSR-1-bound siRNAs. Cell.  
518 2009 Oct 2;139(1):135-48. doi: 10.1016/j.cell.2009.09.012.  
519  
520 [20] Mao H, Zhu C, Zong D, Weng C, Yang X, Huang H, Liu D, Feng X, Guang S. The Nrde  
521 Pathway Mediates Small-RNA-Directed Histone H3 Lysine 27 Trimethylation in

522 *Caenorhabditis elegans*. *Curr Biol*. 2015 Sep 21;25(18):2398-403. doi:

523 10.1016/j.cub.2015.07.051.

524

525 [21] Burkhart KB, Guang S, Buckley BA, Wong L, Bochner AF, Kennedy S. A pre-mRNA-  
526 associating factor links endogenous siRNAs to chromatin regulation. *PLoS Genet*. 2011  
527 Aug;7(8):e1002249. doi: 10.1371/journal.pgen.1002249.

528

529 [22] Richard P, Ogami K, Chen Y, Feng S, Moresco JJ, Yates JR 3rd, Manley JL. NRDE-2,  
530 the human homolog of fission yeast Nrl1, prevents DNA damage accumulation in human  
531 cells. *RNA Biol*. 2018 Aug 2:1-9. doi: 10.1080/15476286.2018.1467180.

532

533 [23] Lin YC, Boone M, Meuris L, Lemmens I, Van Roy N, Soete A, Reumers J, Moisse M,  
534 Plaisance S, Drmanac R, Chen J, Speleman F, Lambrechts D, Van de Peer Y, Tavernier J,  
535 Callewaert N. Genome dynamics of the human embryonic kidney 293 lineage in  
536 response to cell biology manipulations. *Nat Commun*. 2014 Sep 3;5:4767. doi:

537 10.1038/ncomms5767.

538

539 [24] Bylund L, Kytölä S, Lui WO, Larsson C, Weber G. Analysis of the cytogenetic stability  
540 of the human embryonal kidney cell line 293 by cytogenetic and STR profiling  
541 approaches. *Cytogenet Genome Res*. 2004;106(1):28-32.

542

- 543 [25] Belin BJ, Lee T, Mullins RD. DNA damage induces nuclear actin filament assembly by  
544 Formin -2 and Spire-½ that promotes efficient DNA repair. [corrected]. Elife. 2015 Aug  
545 19;4:e07735. doi: 10.7554/eLife.07735. Erratum in: Elife. 2015;4. doi:  
546 10.7554/eLife.11935.
- 547
- 548 [26] Caridi CP, D'Agostino C, Ryu T, Zapotoczny G, Delabaere L, Li X, Khodaverdian VY,  
549 Amaral N, Lin E, Rau AR, Chiolo I. Nuclear F-actin and myosins drive relocalization of  
550 heterochromatic breaks. Nature. 2018 Jul;559(7712):54-60. doi: 10.1038/s41586-018-  
551 0242-8.
- 552
- 553 [27] Kim asutis KM, Kozminski KG. Cell cycle checkpoint regulators reach a zillion. Cell  
554 Cycle. 2013 May 15;12(10):1501-9. doi: 10.4161/cc.24637.
- 555
- 556 [28] Hamperl S, Cimprich KA. Conflict Resolution in the Genome: How Transcription and  
557 Replication Make It Work. Cell. 2016 Dec 1;167(6):1455-1467. doi:  
558 10.1016/j.cell.2016.09.053.
- 559
- 560 [29] Segil N, Guermah M, Hoffmann A, Roeder RG, Heintz N. Mitotic regulation of TFIIID:  
561 inhibition of activator-dependent transcription and changes in subcellular localization.  
562 Genes Dev. 1996 Oct 1;10(19):2389-400.
- 563

- 564 [30] Taylor WR, Stark GR. Regulation of the G2/M transition by p53. *Oncogene*. 2001  
565 Apr 5;20(15):1803-15.  
566
- 567 [31] Kimble J, Simpson P. The LIN-12/Notch signaling pathway and its regulation. *Annu*  
568 *Rev Cell Dev Biol*. 1997;13:333-61.  
569
- 570 [32] Fox PM, Schedl T. Analysis of Germline Stem Cell Differentiation Following Loss of  
571 GLP-1 Notch Activity in *Caenorhabditis elegans*. *Genetics*. 2015 Sep;201(1):167-84. doi:  
572 10.1534/genetics.115.178061.  
573
- 574 [33] Dalfó D, Michaelson D, Hubbard EJ. Sensory regulation of the *C. elegans* germline  
575 through TGF- $\beta$ -dependent signaling in the niche. *Curr Biol*. 2012 Apr 24;22(8):712-9. doi:  
576 10.1016/j.cub.2012.02.064.  
577
- 578 [34] Michaelson D, Korta DZ, Capua Y, Hubbard EJ. Insulin signaling promotes germline  
579 proliferation in *C. elegans*. *Development*. 2010 Feb;137(4):671-80. doi:  
580 10.1242/dev.042523. Erratum in: *Development*. 2014 Jan;141(1):237.  
581
- 582 [35] Begasse ML, Leaver M, Vazquez F, Grill SW, Hyman AA. Temperature Dependence  
583 of Cell Division Timing Accounts for a Shift in the Thermal Limits of *C. elegans* and  
584 *C. briggsae*. *Cell Rep*. 2015 Feb 4. pii: S2211-1247(15)00007-8. doi:  
585 10.1016/j.celrep.2015.01.006.

586

587 [36] Claycomb JM, Batista PJ, Pang KM, Gu W, Vasale JJ, van Wolfswinkel JC, Chaves DA,  
588 Shirayama M, Mitani S, Ketting RF, Conte D Jr, Mello CC. The Argonaute CSR-1 and its  
589 22G-RNA cofactors are required for holocentric chromosome segregation. *Cell*. 2009 Oct  
590 2;139(1):123-34. doi: 10.1016/j.cell.2009.09.014.

591

592 [37] Vought VE, Ohmachi M, Lee MH, Maine EM. EGO-1, a putative RNA-directed RNA  
593 polymerase, promotes germ line proliferation in parallel with GLP-1/notch signaling and  
594 regulates the spatial organization of nuclear pore complexes and germ line P granules in  
595 *Caenorhabditis elegans*. *Genetics*. 2005 Jul;170(3):1121-32.

596

597 [38] Maine EM, Hauth J, Ratliff T, Vought VE, She X, Kelly WG. EGO-1, a putative RNA-  
598 dependent RNA polymerase, is required for heterochromatin assembly on unpaired dna  
599 during *C. elegans* meiosis. *Curr Biol*. 2005 Nov 8;15(21):1972-8.

600

601 [39] Duchaine TF, Wohlschlegel JA, Kennedy S, Bei Y, Conte D Jr, Pang K, Brownell DR,  
602 Harding S, Mitani S, Ruvkun G, Yates JR 3rd, Mello CC. Functional proteomics reveals  
603 the biochemical niche of *C. elegans* DCR-1 in multiple small-RNA-mediated pathways.  
604 *Cell*. 2006 Jan 27;124(2):343-54.

605

- 606 [40] Sy Bukhari SI, Vasquez-Rifo A, Gagné D, Paquet ER, Zetka M, Robert C, Masson JY,  
607 Simard MJ. The microRNA pathway controls germ cell proliferation and differentiation in  
608 *C. elegans*. Cell Res. 2012 Jun;22(6):1034-45. doi: 10.1038/cr.2012.31.  
609
- 610 [41] Rocheleau CE, Cullison K, Huang K, Bernstein Y, Spilker AC, Sundaram MV. The  
611 *Caenorhabditis elegans* ekl (enhancer of ksr-1 lethality) genes include putative  
612 components of a germline small RNA pathway. Genetics. 2008 Mar;178(3):1431-43. doi:  
613 10.1534/genetics.107.084608.  
614
- 615 [42] Menck CF, Munford V. DNA repair diseases: What do they tell us about cancer and  
616 aging? Genet Mol Biol. 2014 Mar;37(1 Suppl):220-33.  
617
- 618 [43] Lubas M, Christensen MS, Kristiansen MS, Domanski M, Falkenby LG, Lykke-  
619 Andersen S, Andersen JS, Dziembowski A, Jensen TH. Interaction profiling identifies the  
620 human nuclear exosome targeting complex. Mol Cell. 2011 Aug 19;43(4):624-37. doi:  
621 10.1016/j.molcel.2011.06.028.  
622
- 623 [44] Ogami K, Richard P, Chen Y, Hoque M, Li W, Moresco JJ, Yates JR 3rd, Tian B,  
624 Manley JL. An Mtr4/ZFC3H1 complex facilitates turnover of unstable nuclear RNAs to  
625 prevent their cytoplasmic transport and global translational repression. Genes Dev.  
626 2017 Jun 15;31(12):1257-1271. doi: 10.1101/gad.302604.117.  
627

628 [45] Virtanen JA, Vartiainen MK. Diverse functions for different forms of nuclear actin.

629 *Curr Opin Cell Biol.* 2017 Jun;46:33-38. doi: 10.1016/j.ceb.2016.12.004.

630

631 [46] Barnum KJ, O'Connell MJ. Cell cycle regulation by checkpoints. *Methods Mol Biol.*

632 2014;1170:29-40. doi: 10.1007/978-1-4939-0888-2\_2.

633

634 [47] McMurchy AN, Stempor P, Gaarenstroom T, et al. A team of heterochromatin

635 factors collaborates with small RNA pathways to combat repetitive elements and

636 germline stress. Heard E, ed. *eLife.* 2017;6:e21666. doi:10.7554/eLife.21666.

637

638 [48] Hamperl S, Cimprich KA. Conflict Resolution in the Genome: How Transcription and

639 Replication Make It Work. *Cell.* 2016 Dec 1;167(6):1455-1467. doi:

640 10.1016/j.cell.2016.09.053.

641

642 [49] Larson AG, Elnatan D, Keenen MM, Trnka MJ, Johnston JB, Burlingame AL, Agard

643 DA, Redding S, Narlikar GJ. Liquid droplet formation by HP1 $\alpha$  suggests a role for phase

644 separation in heterochromatin. *Nature.* 2017 Jul 13;547(7662):236-240. doi:

645 10.1038/nature22822.



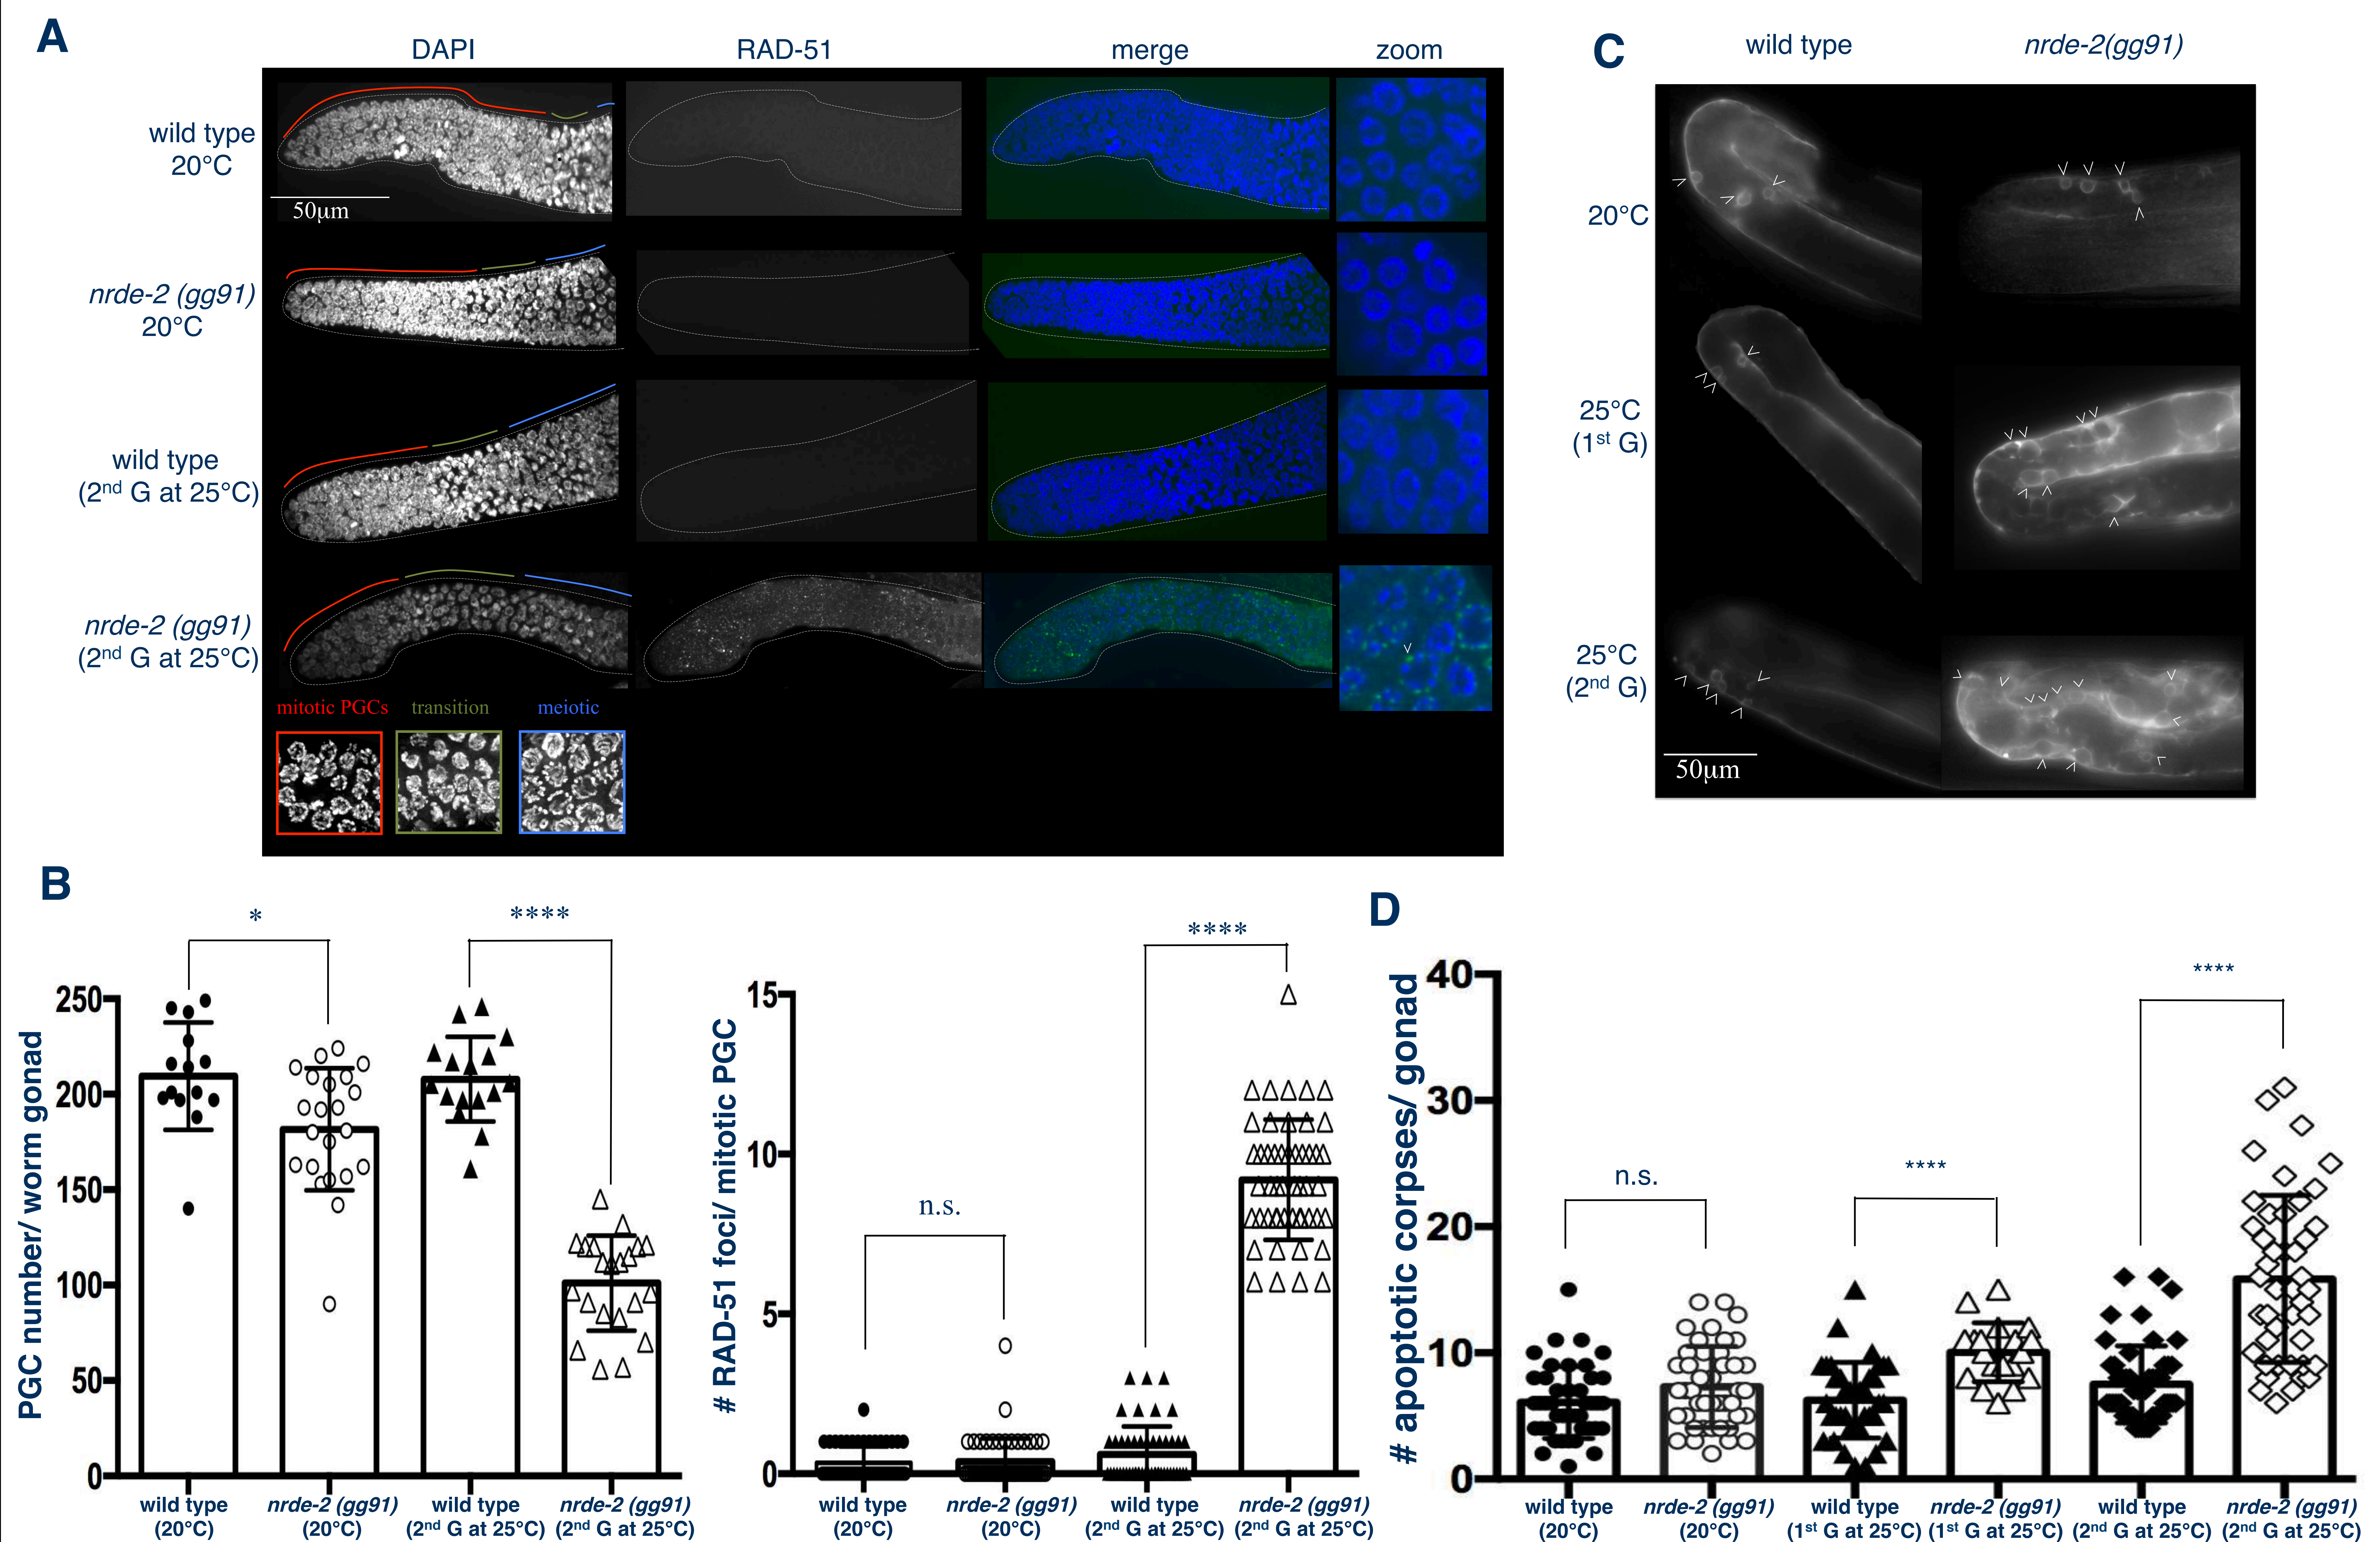

**Figure 1A: Loss of NRDE-2 significantly decreases the number of mitotic germ cells and increases the accumulation of RAD-51 foci in these cells in worms grown for two generations at 25°C.** Maximum intensity projections of DAPI stained gonads with RAD-51 foci visualized in the green channel using an antibody against RAD-51. (Left panels) The red line indicates mitotic proliferating germ cell zone, the green line indicates transition zone where DAPI labeled chromosomes exhibit a “crescent-like” morphology, and the blue line indicates meiotic zone. (Right panels) Zoomed in image of one focal plane of mitotic PGCs. The white arrow indicates a single RAD-51 puncta. **Figure 1B: (Left Panel) Loss of NRDE-2 at 20°C decreases the number of PGCs and this is exacerbated when the worms are grown for two generations at 25°C.** Mean number  $\pm$  SEM of PGCs in gonads of wild type propagated at 20°C ( $209.6 \pm 7.518$ ,  $n=14$ ) and *nrde-2(gg91)* mutants propagated at 20°C ( $181.6 \pm 6.830$ ,  $n=22$ ) are different (\* $p=0.0115$ ). PGCs of G2 wild type worms propagated at 25°C ( $207.9 \pm 5.542$ ,  $n=16$ ) and G2 *nrde-2(gg91)* mutants propagated at 25°C ( $101.0 \pm 5.418$ ,  $n=21$ ) is different (\*\*\*\* $p<0.0001$ ). **(Right panel) Loss of NRDE2 at 25°C increases the number of RAD-51 foci per PGC nucleus.** The focal plane with the greatest number of RAD-51 foci was chosen for each germ cell nucleus. The number of RAD-51 foci per nuclear focal plane cell were averaged across 50 mitotic PGCs (10 PGCs closest to the distal tip cell in 5 gonads per condition). Mean number  $\pm$  SEM of RAD-51 foci in gonads of wild type propagated at 20°C ( $0.3400 \pm 0.07346$ ,  $n=50$ ) and *nrde-2(gg91)* mutants propagated at 20°C ( $0.3800 \pm 0.1026$ ,  $n=50$ ) are not different. RAD-51 foci of G2 wild type worms propagated at 25°C ( $0.6000 \pm 0.1245$ ,  $n=50$ ) have more RAD-51 foci than G2 *nrde-2(gg91)* mutants propagated at 25°C ( $9.200 \pm 0.2665$ ,  $n=50$ , \*\*\*\* $p<0.0001$ ). All data represents 3 experimental days and the p-values were determined using unpaired Student’s t test. **Figure 1C: Loss of NRDE-2 increases the number of CED-1::GFP-labeled cell corpses in worms grown for 1 or 2 generations at 25°C.** CED-1::GFP expressed in *nrde-2(gg91)* and wild type *C. elegans* gonads (white arrows indicate apoptotic cell corpses). **Figure 1D: Loss of NRDE-2 increases the number of apoptotic corpses in the gonads of worms grown for 1 or 2 generations at 25°C.** Quantification of CED-1::GFP labeled germ cells. Wild type worms propagated at 20°C ( $6.071 \pm 0.4409$ ,  $n=42$ ) have the same number of corpses as *nrde-2(gg91)* mutants propagated at 20°C ( $7.302 \pm 0.4897$ ,  $n=43$ ). Wild type worms ( $6.263 \pm 0.4869$ ,  $n=38$ ) have fewer cell corpses than *nrde-2(gg91)* mutants when grown for 1 generation at 25°C ( $10.05 \pm 0.5379$ ,  $n=19$ , \*\*\*\* $p<0.0001$ ). Wild type worms ( $7.510 \pm 0.4278$ ,  $n=51$ ) have fewer cell corpses than *nrde-2 (gg91)* mutants when grown for 2 generations at 25°C ( $15.86 \pm 0.9987$ ,  $n=44$ , \*\*\*\* $p<0.0001$ ). Cell corpses identified as described in Figure 1D. Data represents 3 experimental days and the p-values were determined using unpaired Student’s t test.



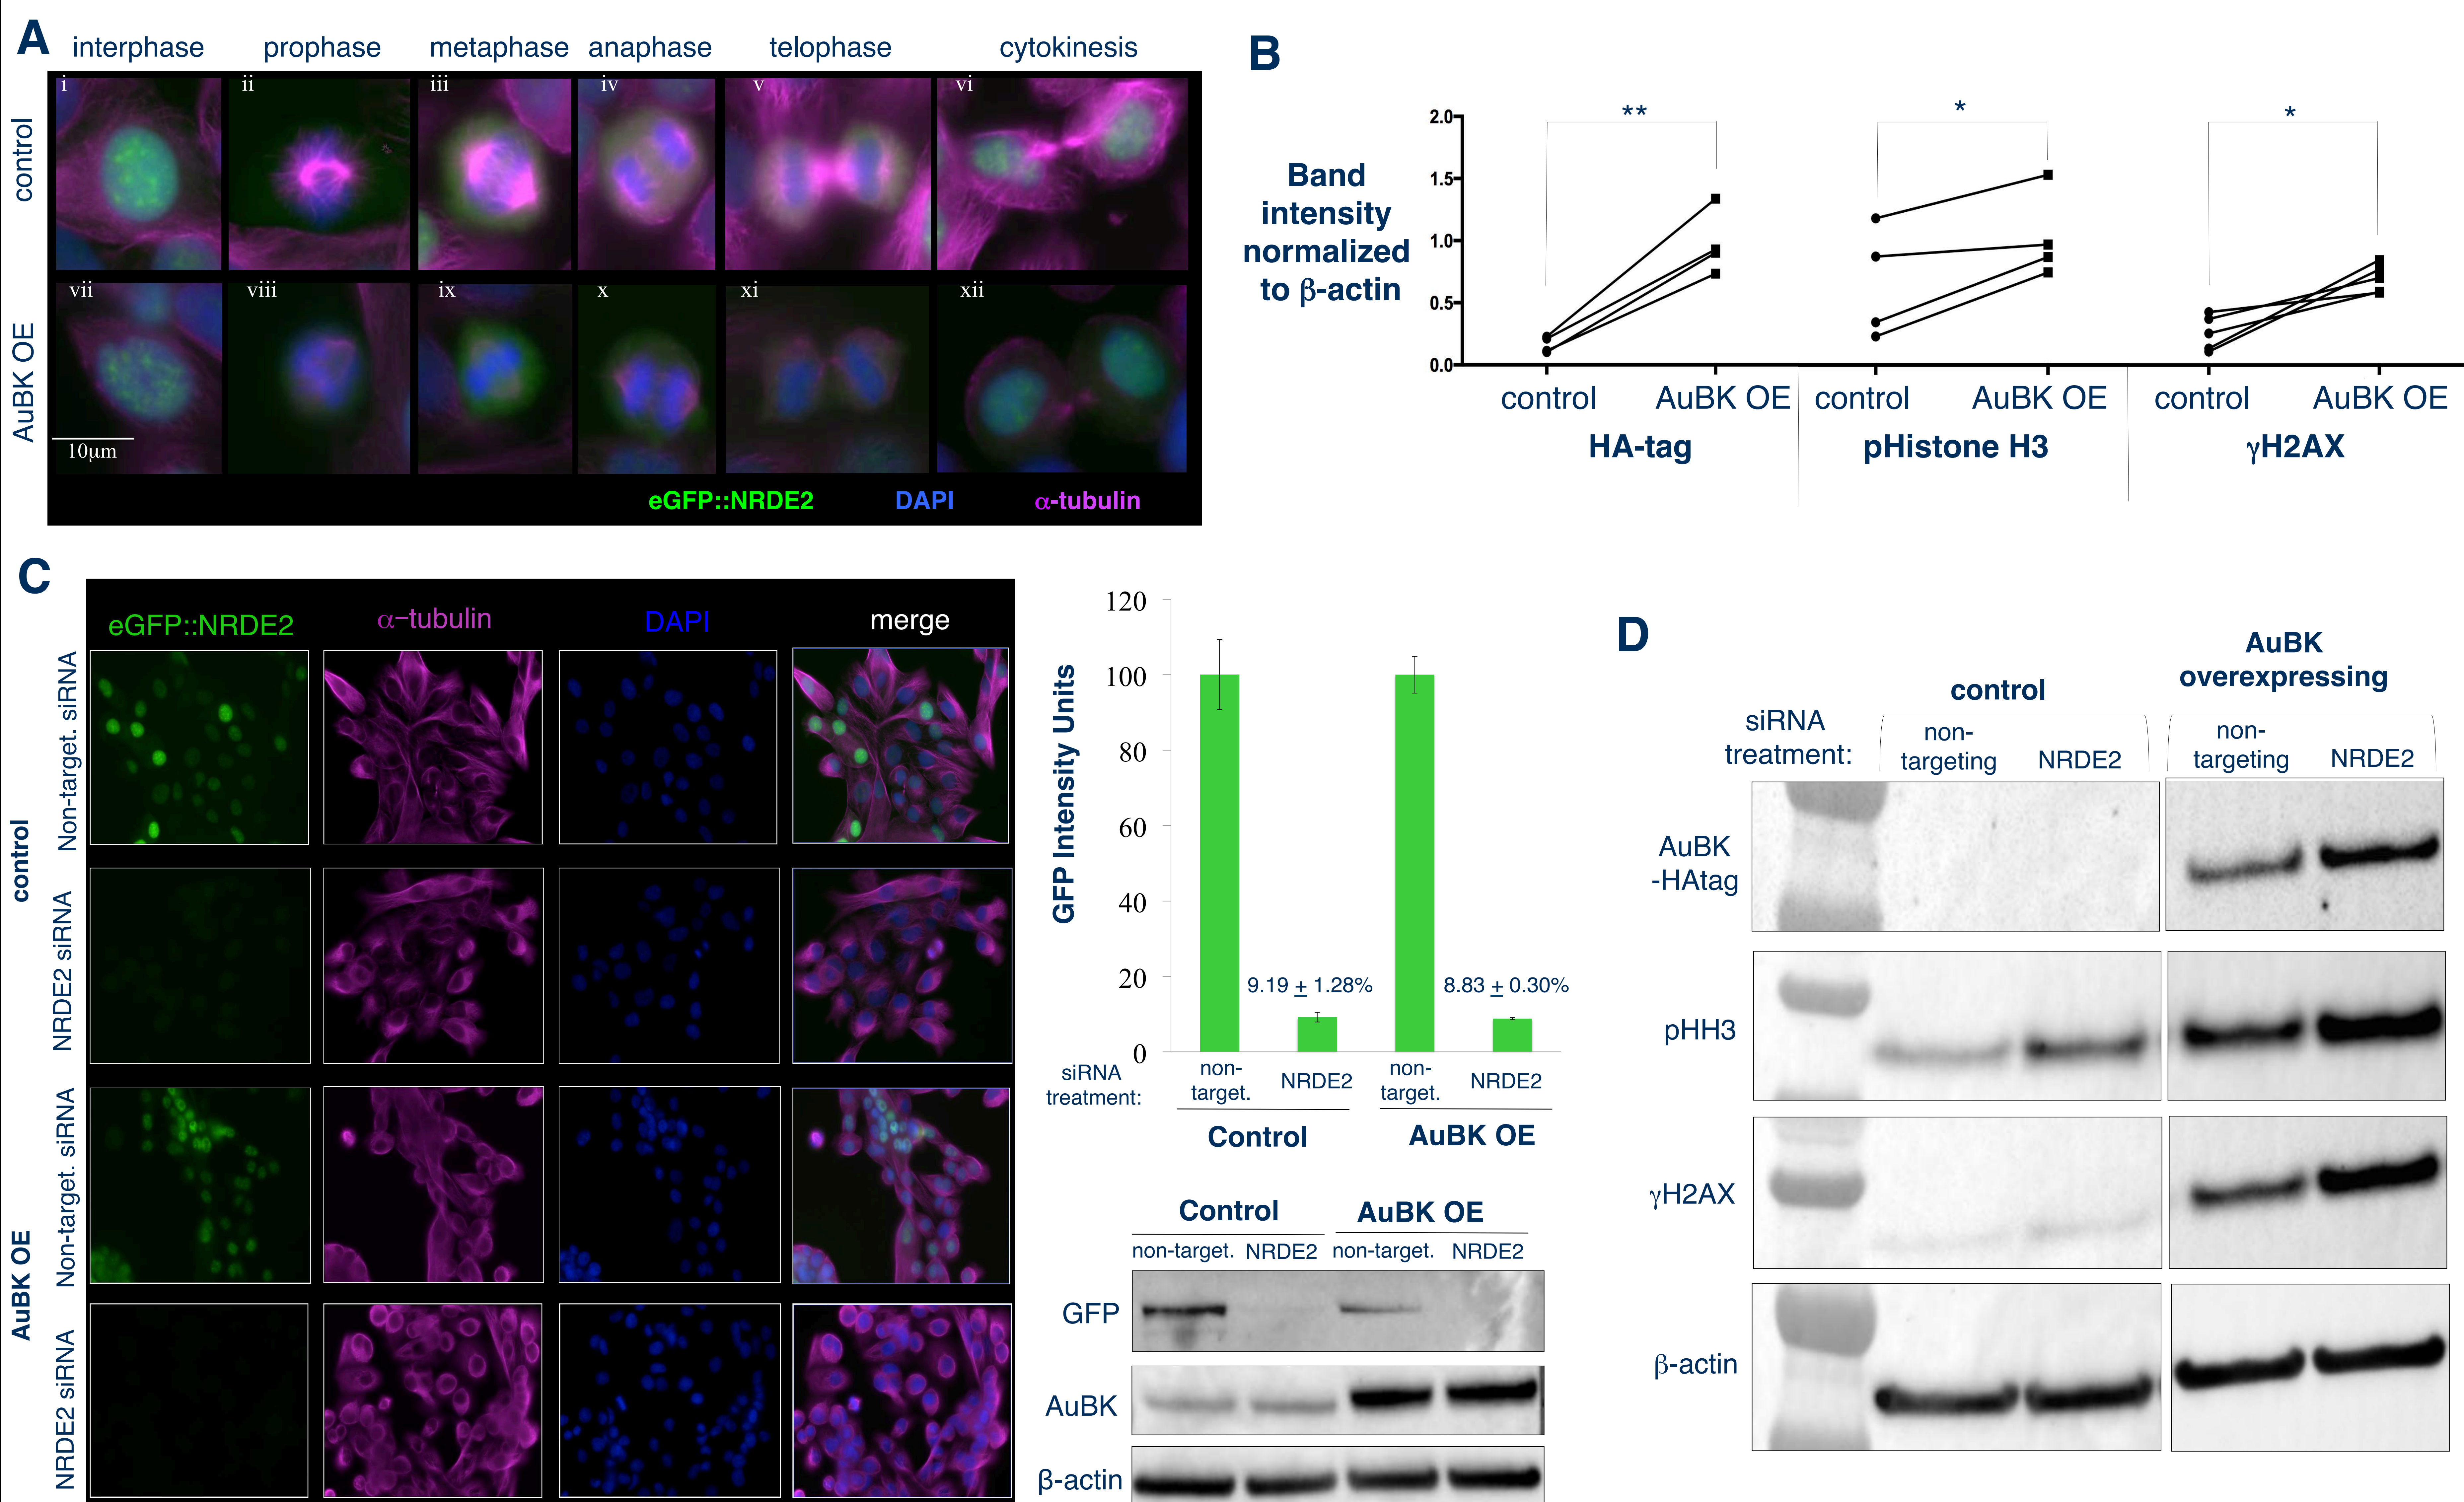

**Figure 2A:** In MCF10A human breast cells with endogenous or overexpressed AuBK levels, eGFP-NRDE2 localizes to puncta within the nucleus when chromatin is de-condensed during interphase and cytokinesis. In each circumstance, eGFP-NRDE2 is diffuse throughout all other stages of mitosis. Epifluorescent images of cells expressing eGFP-tagged NRDE2 as visualized in the green channel, chromatin as visualized by DAPI staining in the blue and the cytoskeleton as visualized by an antibody against  $\alpha$ -tubulin in the Cy5 (far red) channel. (Top row) MCF10A cells expressing control vector. (Bottom row) MCF10A cells over-expressing AuBK. **Figure 2B:** AuBK overexpression in MCF10A cells as a means to stress cells by increasing basal levels of DNA damage. Western blot band intensities (see figure 2D for representative blot) were measured and normalized to  $\beta$ -actin band intensity. HA-tag band intensity in HA-tagged AUBK overexpressing cells is higher than in control cells ( $n=4$ ;  $p=0.0046$ ). Phosphorylated Histone H3 band intensity in AUBK overexpressing cells is higher than in control cells ( $n=4$ ;  $p=0.0337$ ). Phosphorylated H2AX band intensity in AUBK overexpressing cells is higher than in control cells ( $n=5$ ;  $p=0.0146$ ). All  $p$ -values determined by paired Student's  $t$  test. **Figure 2C:** Average GFP intensity in MCF10A cells expressing eGFP-tagged NRDE2 decreases specifically in cells treated with NRDE2 targeted siRNA. (Left) Epifluorescent images of MCF10A cells expressing eGFP-tagged NRDE2 as visualized in the green channel, the cytoskeleton as visualized by an antibody against  $\alpha$ -tubulin in the far red channel and DNA as visualized by DAPI staining in the blue channel. Control or AuBK overexpressing MCF10A cells were treated with non-targeting siRNA or NRDE2 siRNA. (Top right) Quantification of epifluorescent GFP intensity of control and AuBK overexpressing cells treated with NRDE2 siRNA and normalized to the respective non-targeting siRNA treated cells. (Bottom right) Representative western blot using anti-GFP to detect eGFP-tagged NRDE2 in MCF10A cells treated with non-targeting or NRDE2 targeted siRNA. All cells treated with siRNA for 72 hours before imaging. Data represents 4 experimental days. **Figure 2D:** MCF10A cells that overexpress HA-tagged AuBK show an increase in phosphorylated Histone H3 and an increase in the DNA damage marker  $\gamma$ H2AX. Representative blot: Anti-HA-tag used to detect AuBK in cells transformed with AuBK-HAtag in MCF10A cells. AuBK overexpressing cells have increased levels of phosphorylated Histone H3 and increased levels of  $\gamma$ H2AX expression as compared to control cells. Western blot band intensities were measured and normalized to  $\beta$ -actin band intensity. See Fig S3 for quantification and statistics.



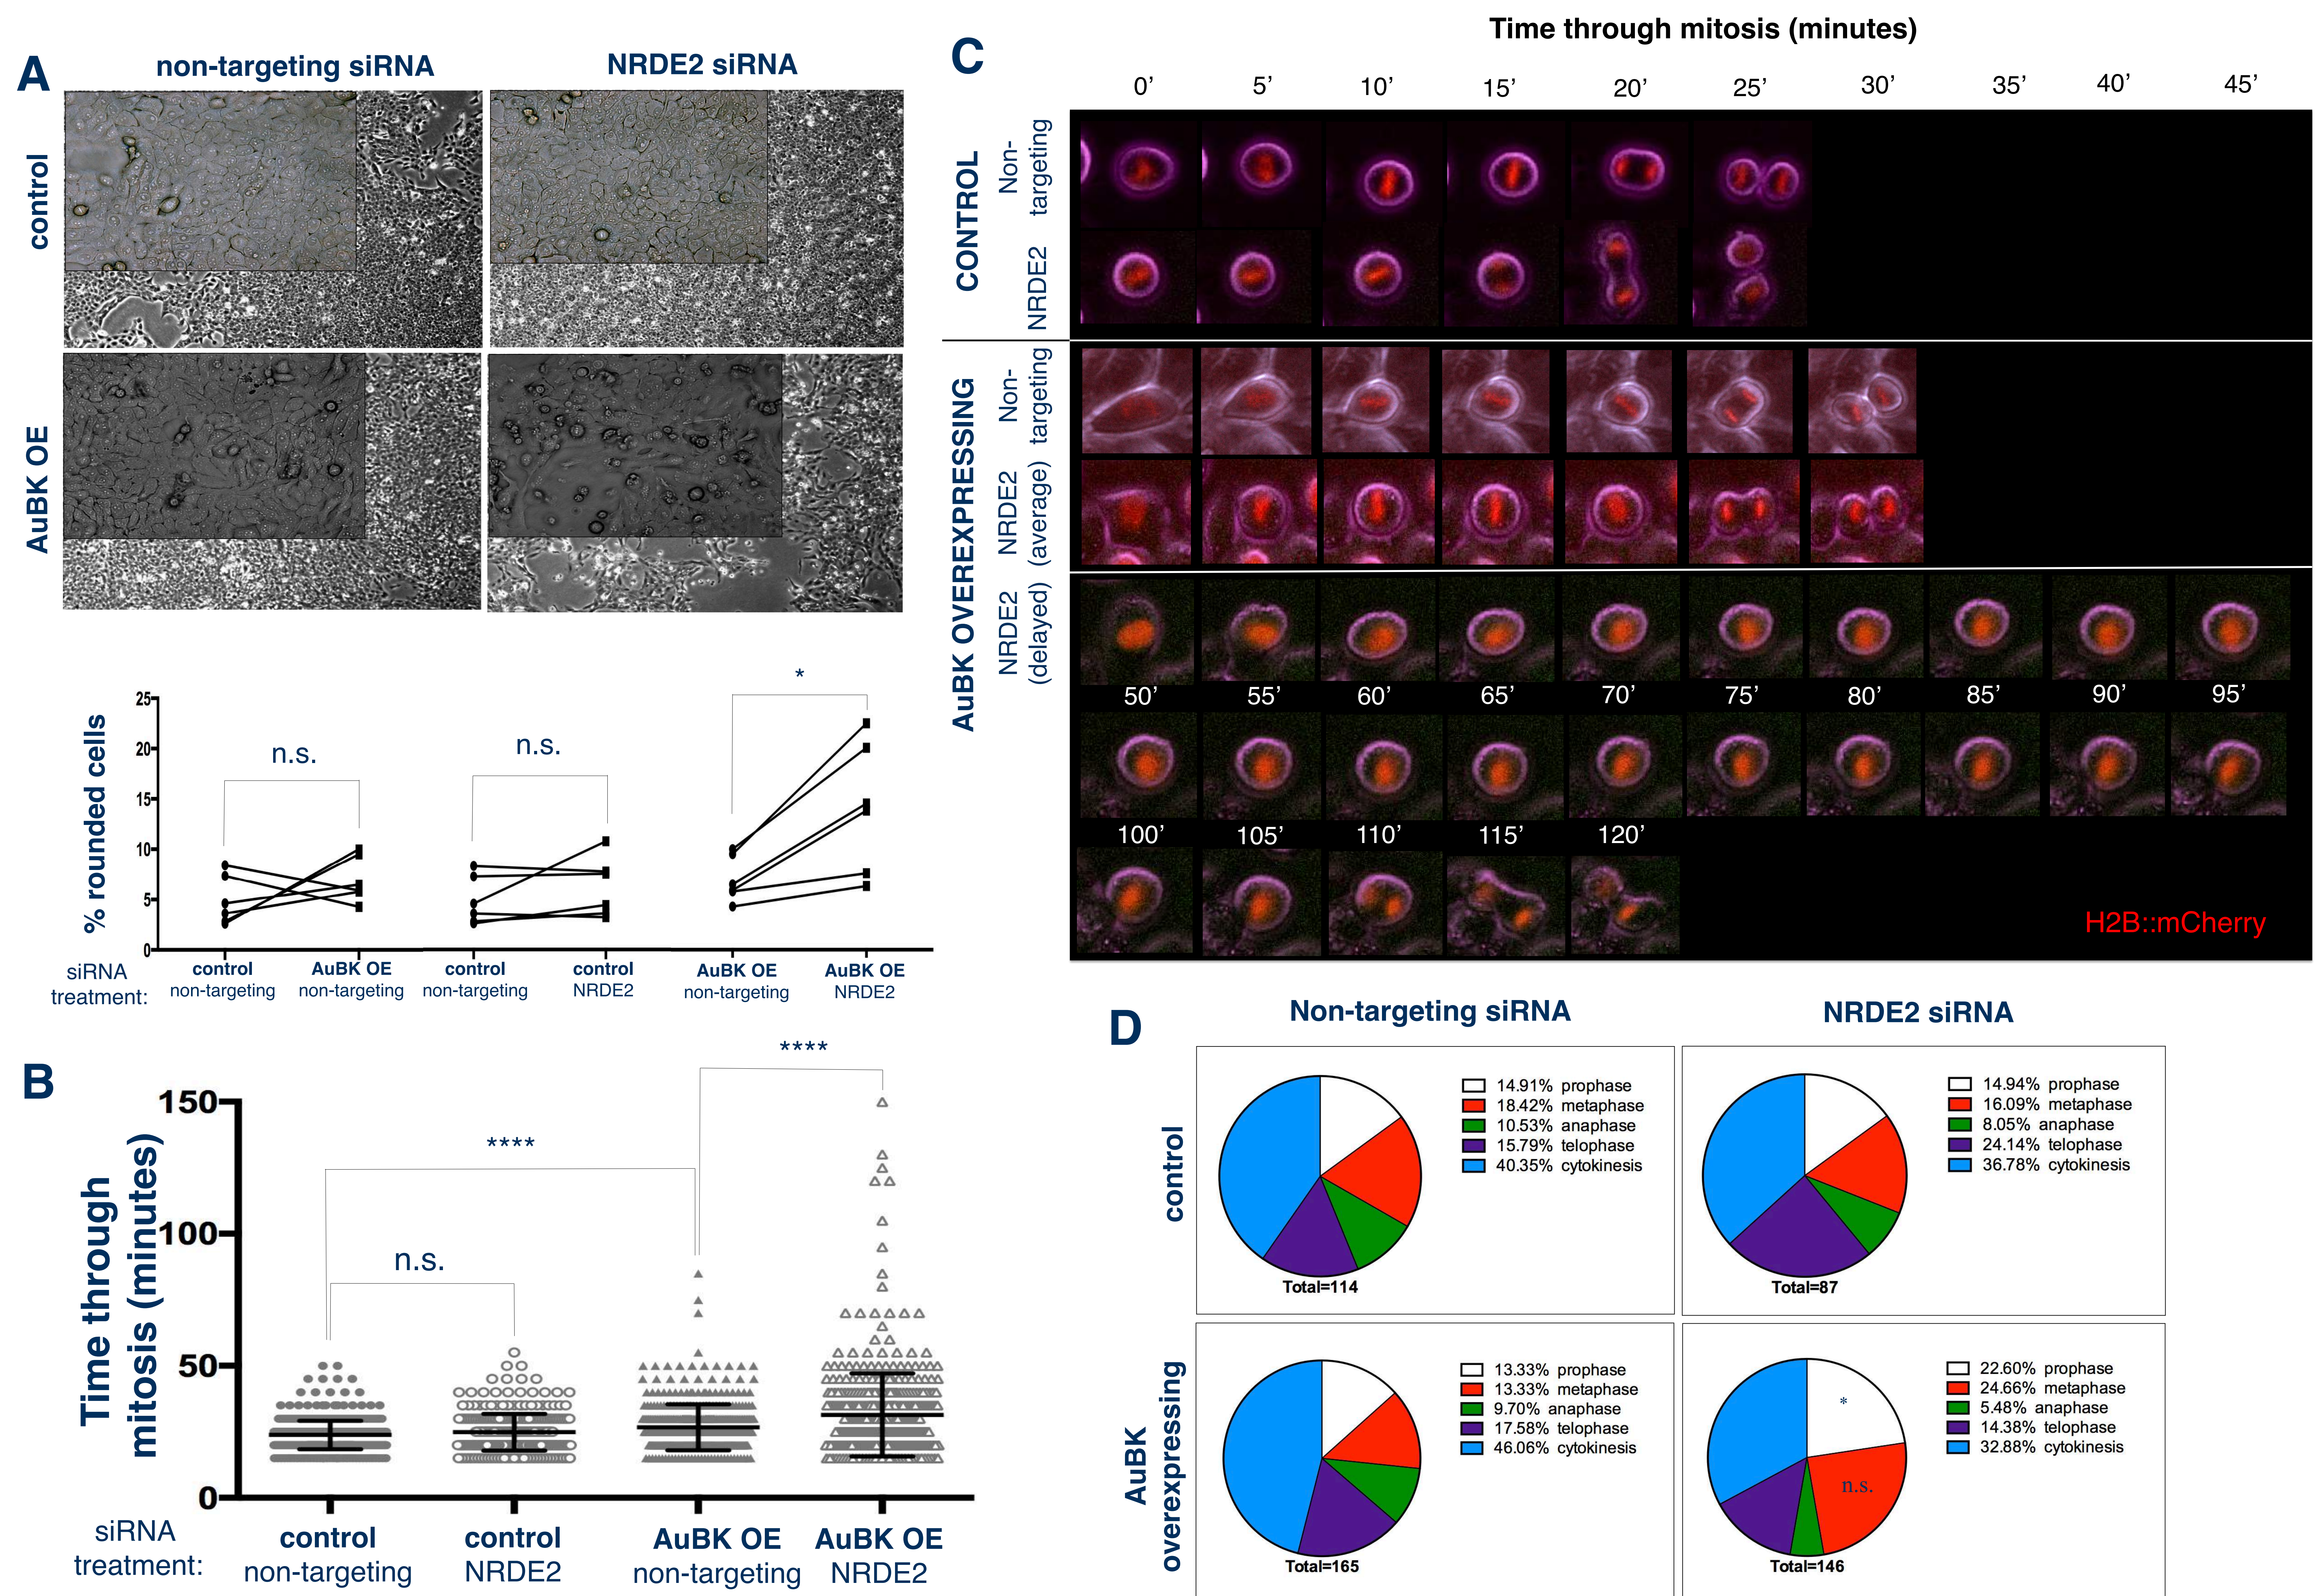

**Figure 3A: Loss of NRDE2 in MCF10A cells overexpressing AuBK results in an increase in the percentage of cells with a rounded morphology.** (Top) Brightfield images of cells 72 hours after siRNA treatment taken with 4x objective and 20x objective (inset). (Bottom) Quantitation of cell morphology. (Left paired points) Control or AuBK OE MCF10A cells show no difference in the percentage of round cells in cultures treated with non-targeting siRNA. (Middle paired points) MCF10A control cells show no difference in the percentage of round cells upon NRDE2 siRNA treatment as compared to non-targeting siRNA treatment. (Right paired points) MCF10A AuBK OE cells show a significant increase (\* $p=0.0110$ ) in the percentage of round cells upon NRDE2 siRNA treatment as compared to non-targeting siRNA treatment. Data represents 6 experimental days. All p-values determined by paired Student's t test. **Figure 3B: Loss of NRDE2 in MCF10A cells overexpressing AuBK delays time through mitosis.** Time required for individual MCF10A cells to through mitosis. Control cells treated with NRDE2 siRNA ( $24.87 \pm 0.3902$ ,  $n=318$ ) do not take significantly longer than control cells treated with non-targeting siRNA ( $23.79 \pm 0.2442$ ,  $n=492$ ) to progress through mitosis ( $p$ =not significant, Mann-Whitney test). AuBK over-expressing cells treated with NRDE2 siRNA ( $31.40 \pm 0.7220$ ,  $n=472$ ) take significantly longer than cell treated with non-targeting siRNA ( $26.72 \pm 0.4120$ ,  $n=451$ ) to progress through mitosis (\*\*\*\* $p<0.0001$ , Mann-Whitney test) **Figure 3C: Loss of NRDE delays time through mitosis in a subset of MCF10A cells overexpressing AuBK** of live MCF10A cells expressing H2B::mCherry visualized in the red channel to visualize chromatin compaction and chromosome separation. **Figure 3D: Loss of NRDE2 in AuBK overexpressing MCF10A cells significantly increases the proportion of cells in prophase.** Quantification of the percentage of cells in each phase of mitosis shows that AuBK overexpressing MCF10A cells have significantly more cells in prophase after treatment with NRDE2 siRNA as compared to treatment with non-targeting siRNA ( $p=0.0258$ , determined by student's t test). Data represents 4 experimental days.



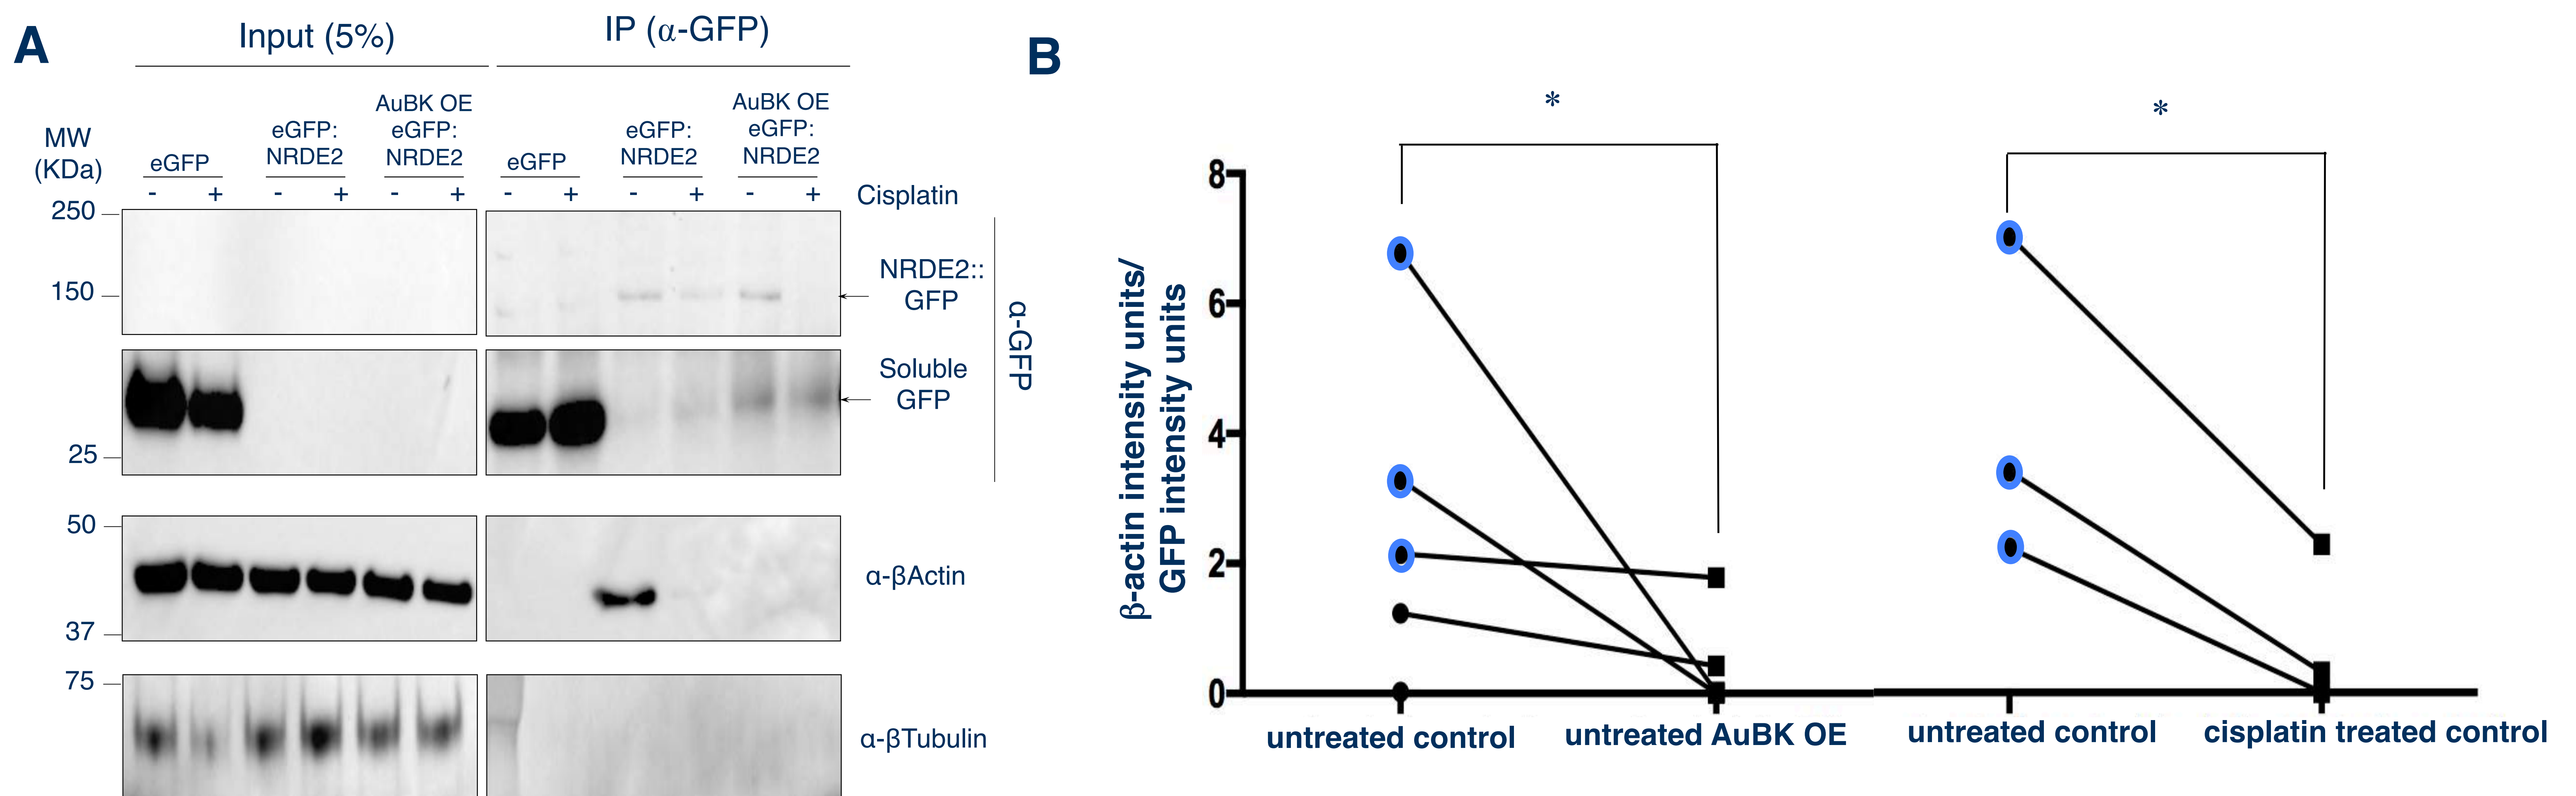

**Figure 4A: eGFP::NRDE2 interacts with  $\beta$ -actin in control cells. This interaction is weakened in AuBK OE cells and when cells are treated with cisplatin.** Representative western blots of MCF10A cell lysates. MCF10A cells were treated with 60uM cisplatin for 16 hours. Co-IP was performed using goat Anti-GFP antibody to pull down eGFP::NRDE2 from MCF10A cell lysates. Western blots were developed using rabbit anti-GFP polyclonal antibody to detect eGFP::NRDE2 and soluble GFP, anti- $\beta$ -actin HRP antibody and mouse anti- $\beta$ -tubulin antibody (negative control). **Figure 4B: The amount of  $\beta$ -actin per unit of IP'd GFP::NRDE2 decreases when DNA damage is induced in cells by AuBK OE or by cisplatin drug treatment.** (Left) The amount of  $\beta$ -actin per unit of co-IP'd eGFP::NRDE2 decreases when MCF10A cells overexpress AuBK as compared to MCF10A control cells (\*Permutation test exact p-value =0.036). (Right) The amount of  $\beta$ -actin per unit of co-IP'd eGFP::NRDE2 decreases when MCF10A control cells are treated with 60uM cisplatin as compared to untreated control MCF10A cells. (\*p-value =0.045 as assessed by paired student's t test). Note: Blue data points represent quantification of the same samples.



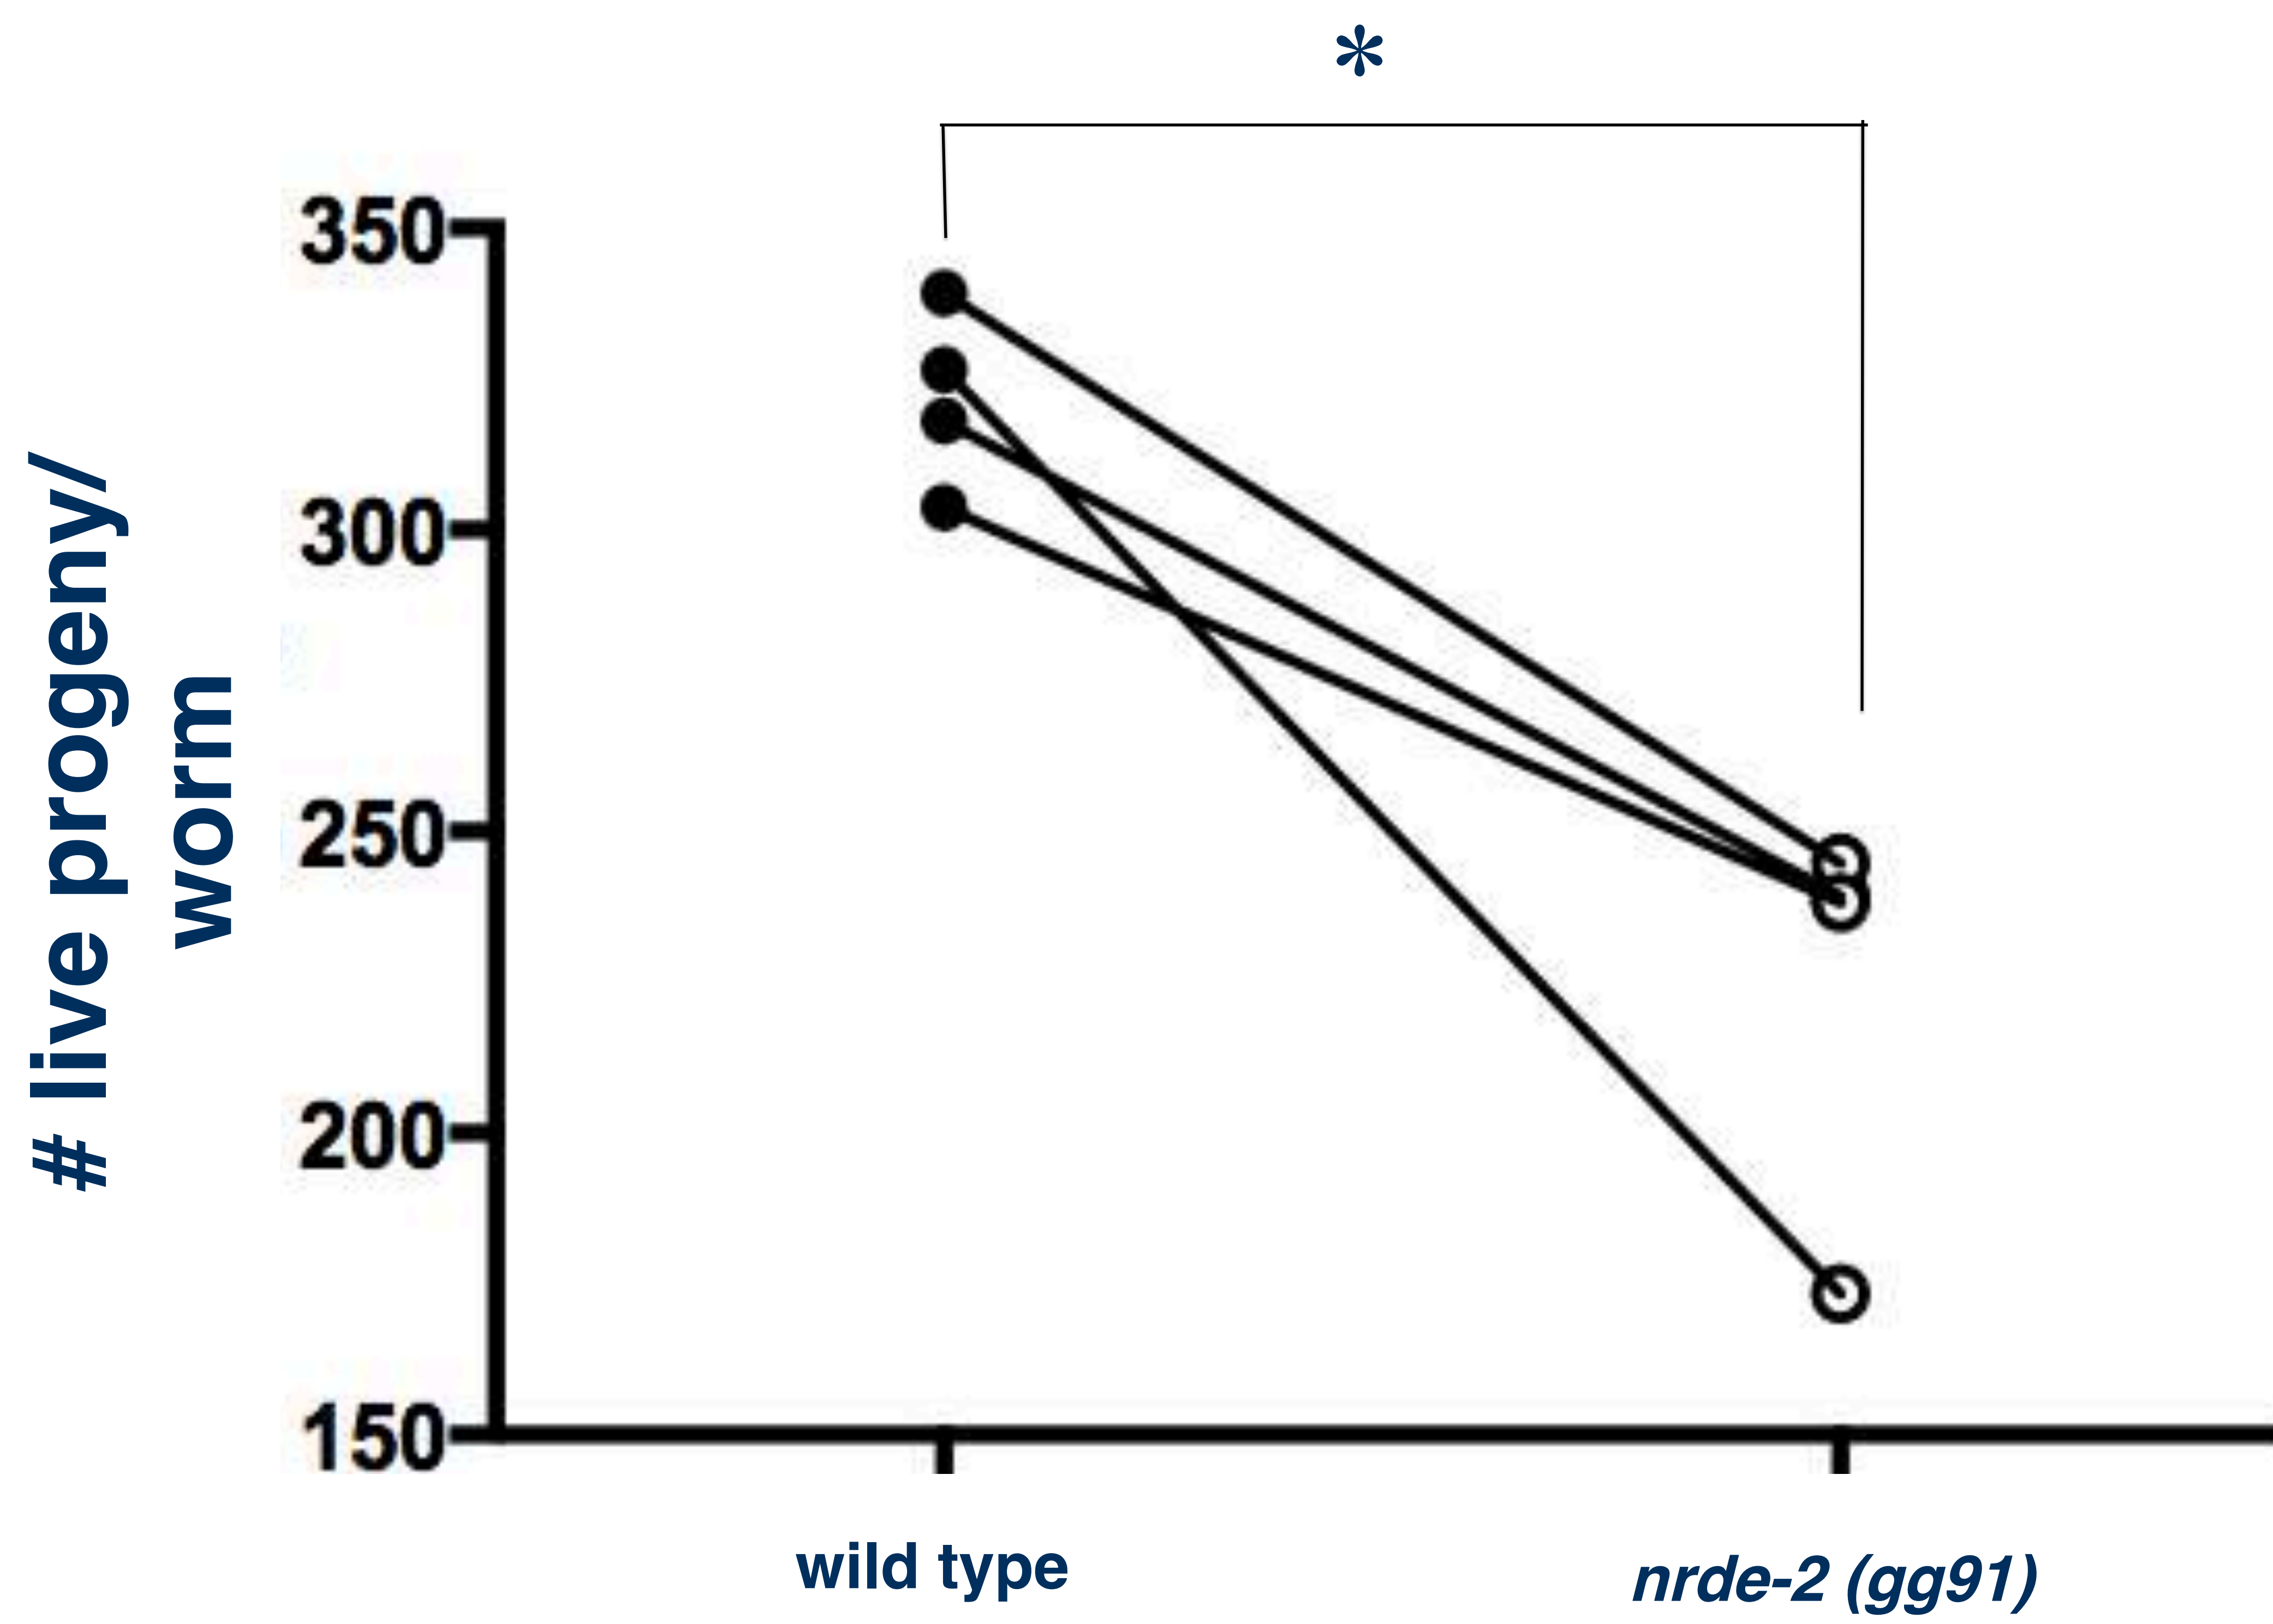

**Figure S1: Loss of NRDE-2 significantly decreases brood size as compared to wild type worms when propagated at 20°C.** Each data point represents one biological replicate of 16 worms per experiment (n=4; \*p=0.0148, paired Student's t test).

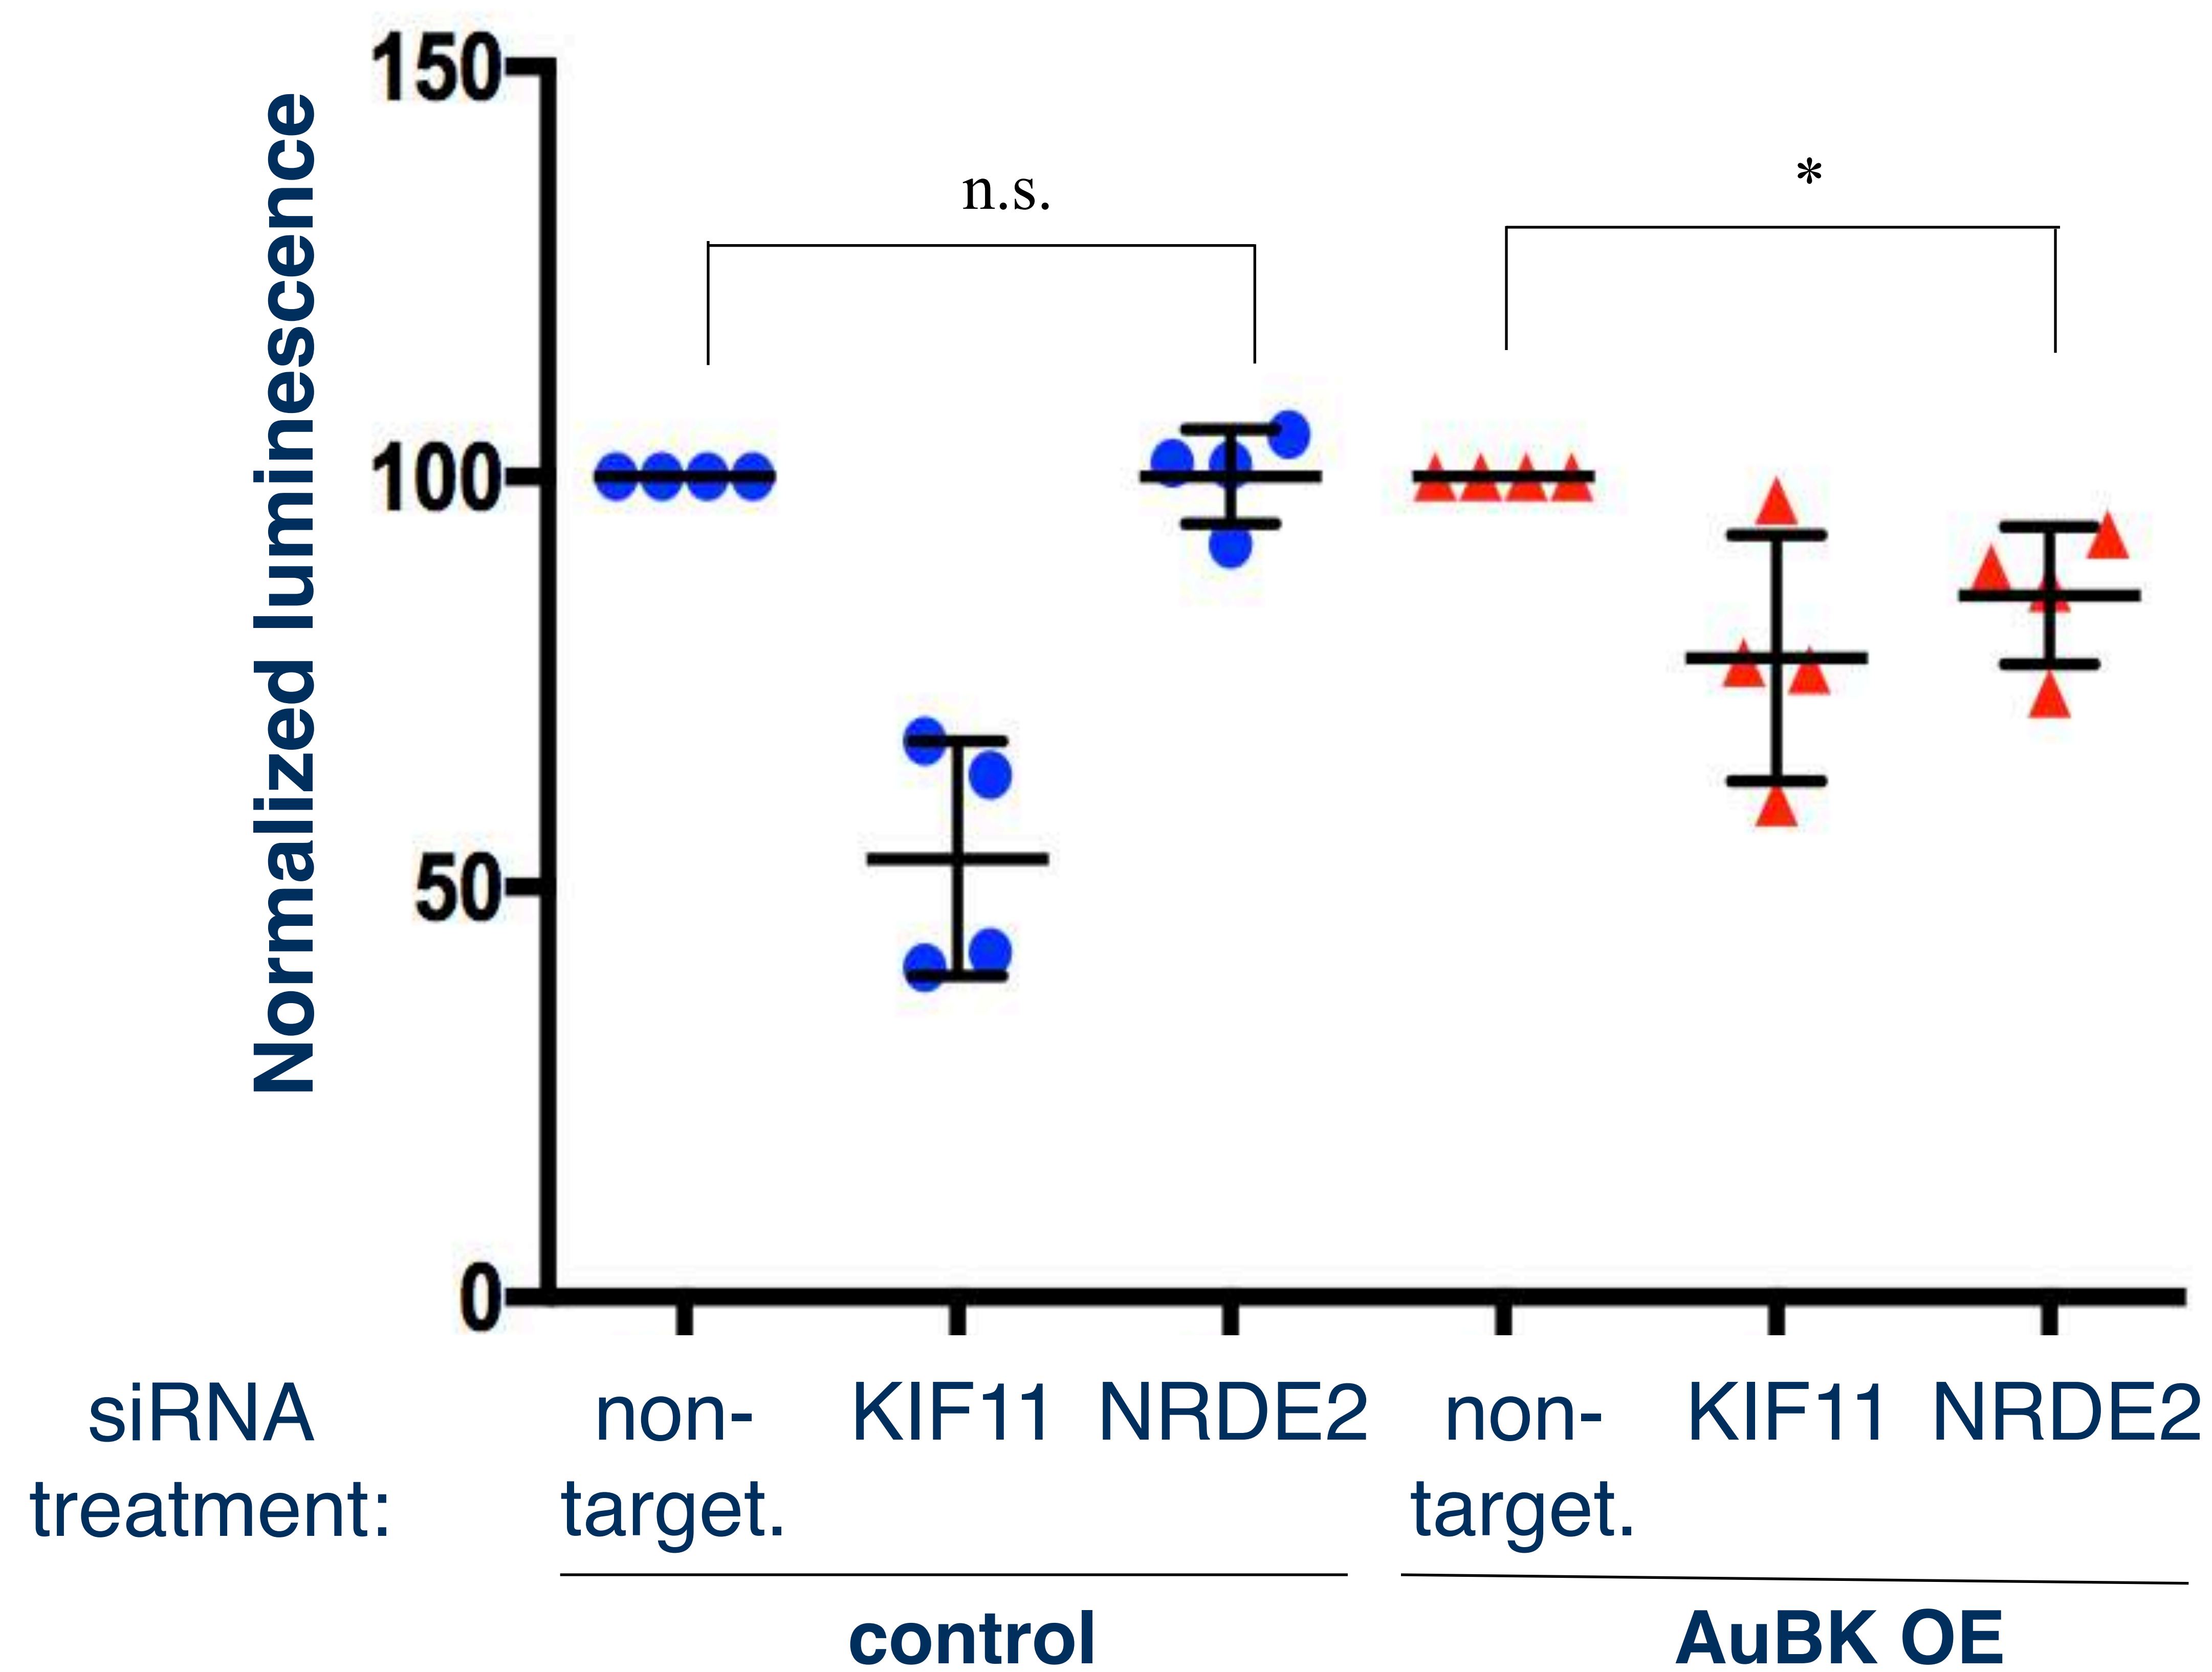

**Figure S2: NRDE2 knockdown decreases cell viability in AuBK OE cells but not in control cells.** The Cell Titer Glo assay measures the number of metabolically active cells by quantifying the amount of ATP present in the cell culture. The luminescent signal was normalized to non-targeting siRNA treated cells in both control cells and AuBK OE cells. KIF11 siRNA was used as a positive control. Control cells treated with NRDE2 siRNA ( $100.0 \pm 2.890$ ,  $n=4$ ) had no change in luminescence as compared to control cells treated with non-targeting siRNA. AuBK OE cells treated with NRDE2 siRNA ( $85.55 \pm 4.167$ ,  $n=4$ ) had a lower amount of luminescence as compared to AuBK OE cells treated with non-targeting siRNA (\* $p=0.0133$ ). P-values determined using unpaired Student's t test.



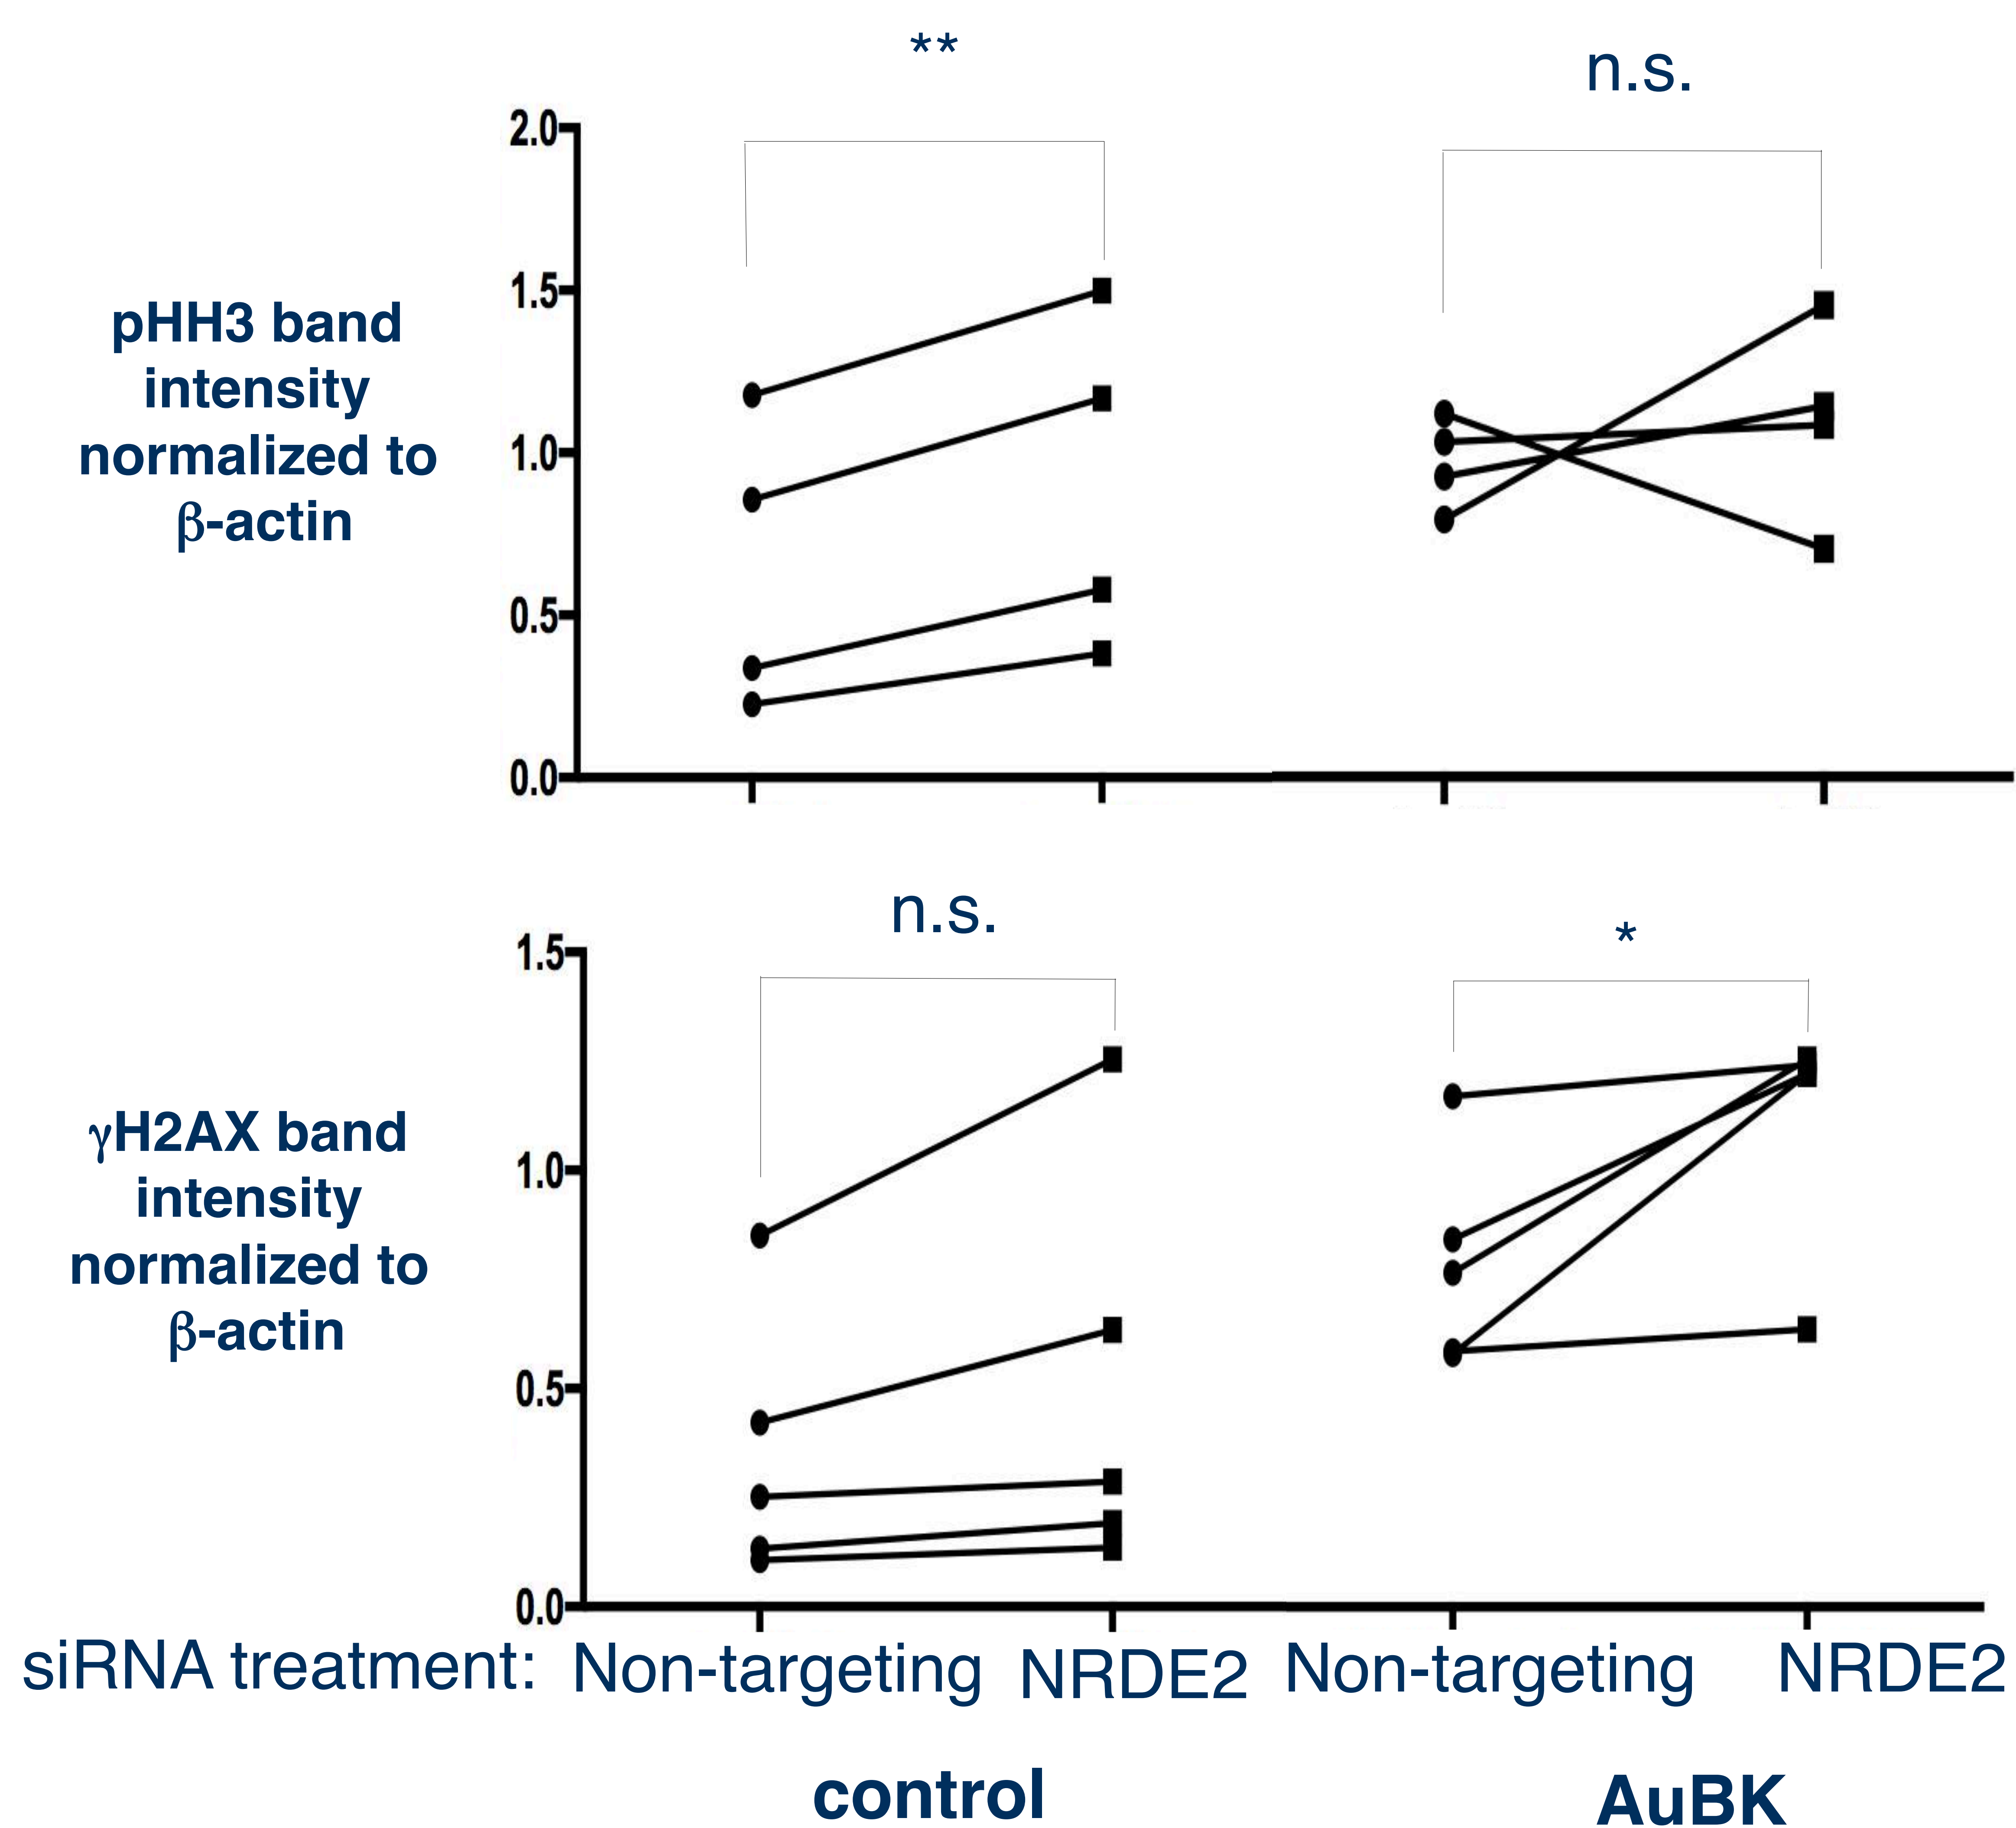

**Figure S3 (Top)** Loss of NRDE2 in control cells increases pHH3 levels as compared to control cells treated with non-targeting siRNA (n=4, p=0.0068). In contrast, loss of NRDE2 in AuBK OE cells does not change pHH3 levels (p=???). (Bottom) Loss of NRDE2 in control cells does not alter levels of γH2AX (p=????), however in AuBK OE cells, loss of NRDE2 increases γH2AX levels. (n=5, \*p=0.0483) All p-values determined using paired student's t test.

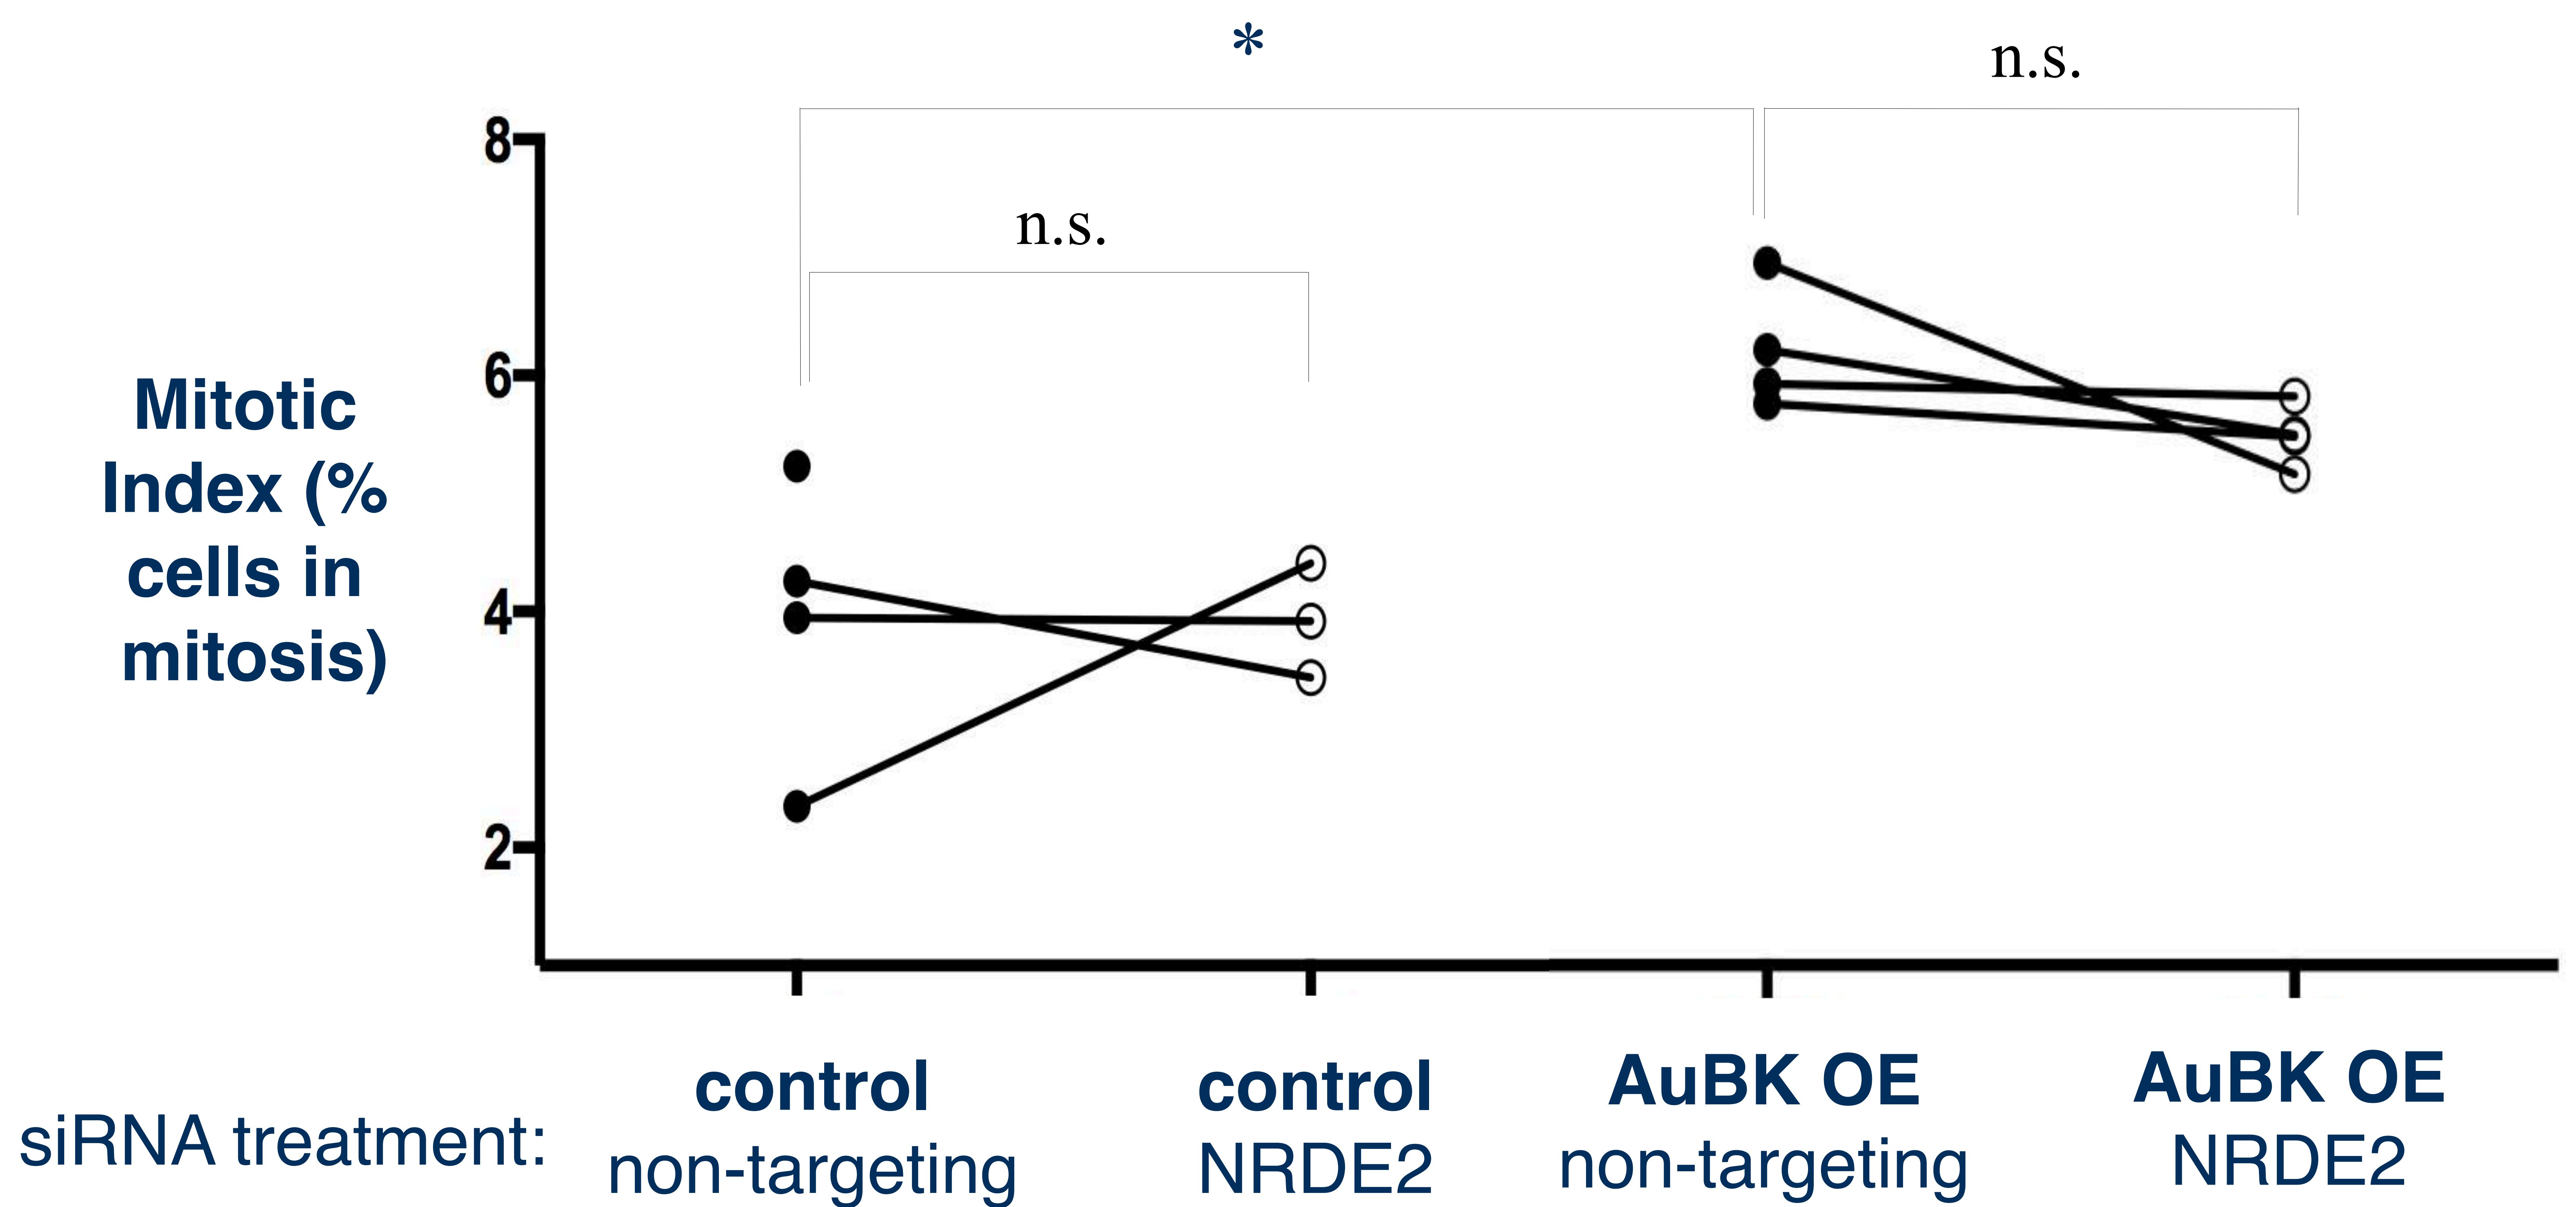

**Figure S4: Loss of NRDE2 in MCF10A cells does not significantly change the mitotic index.** Mitotic Index calculated by dividing total number of cells in mitosis by total number of cells in the population. AuBK overexpressing cells have a significantly higher basal mitotic index than control cells (\* $p=0.0315$ , student's paired t test).



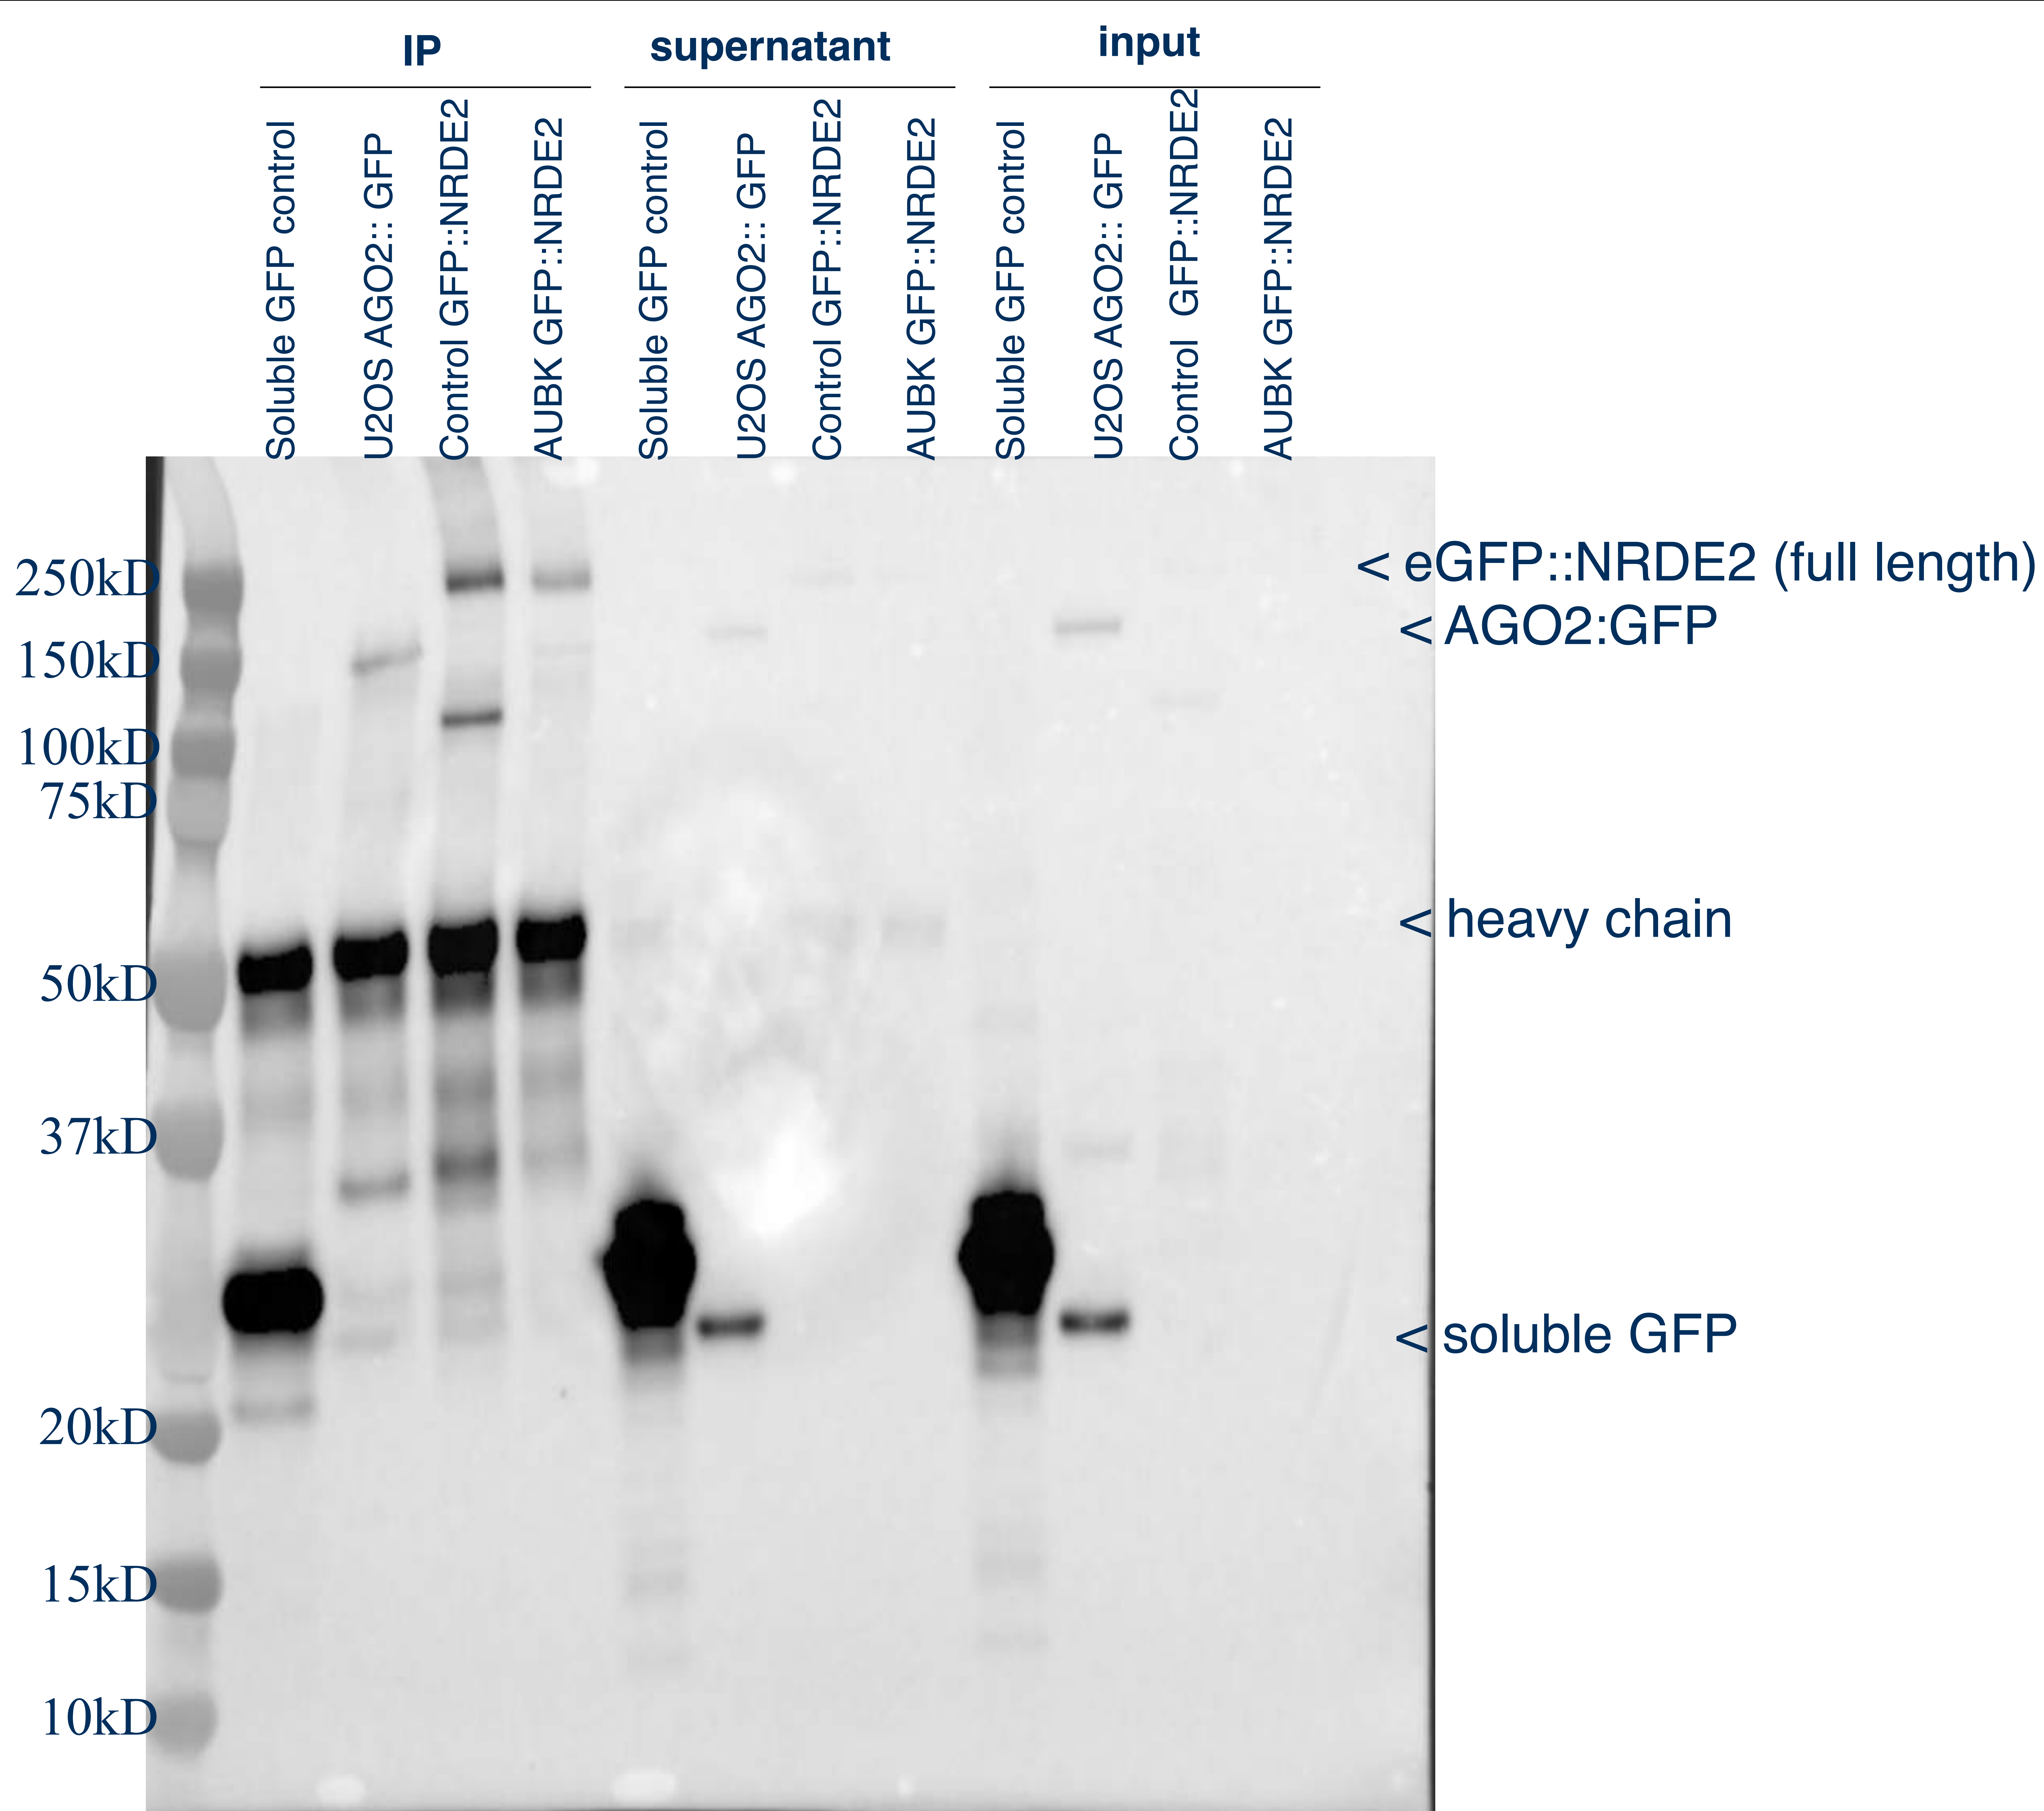

**Figure S5: Representative western blot of MCF10A cell lysates.** Co-IP was performed using goat Anti-GFP antibody to pull down eGFP::NRDE2 from MCF10A cell lysates. Western blots were developed using rabbit anti-GFP polyclonal antibody to detect eGFP::NRDE2 and soluble GFP.



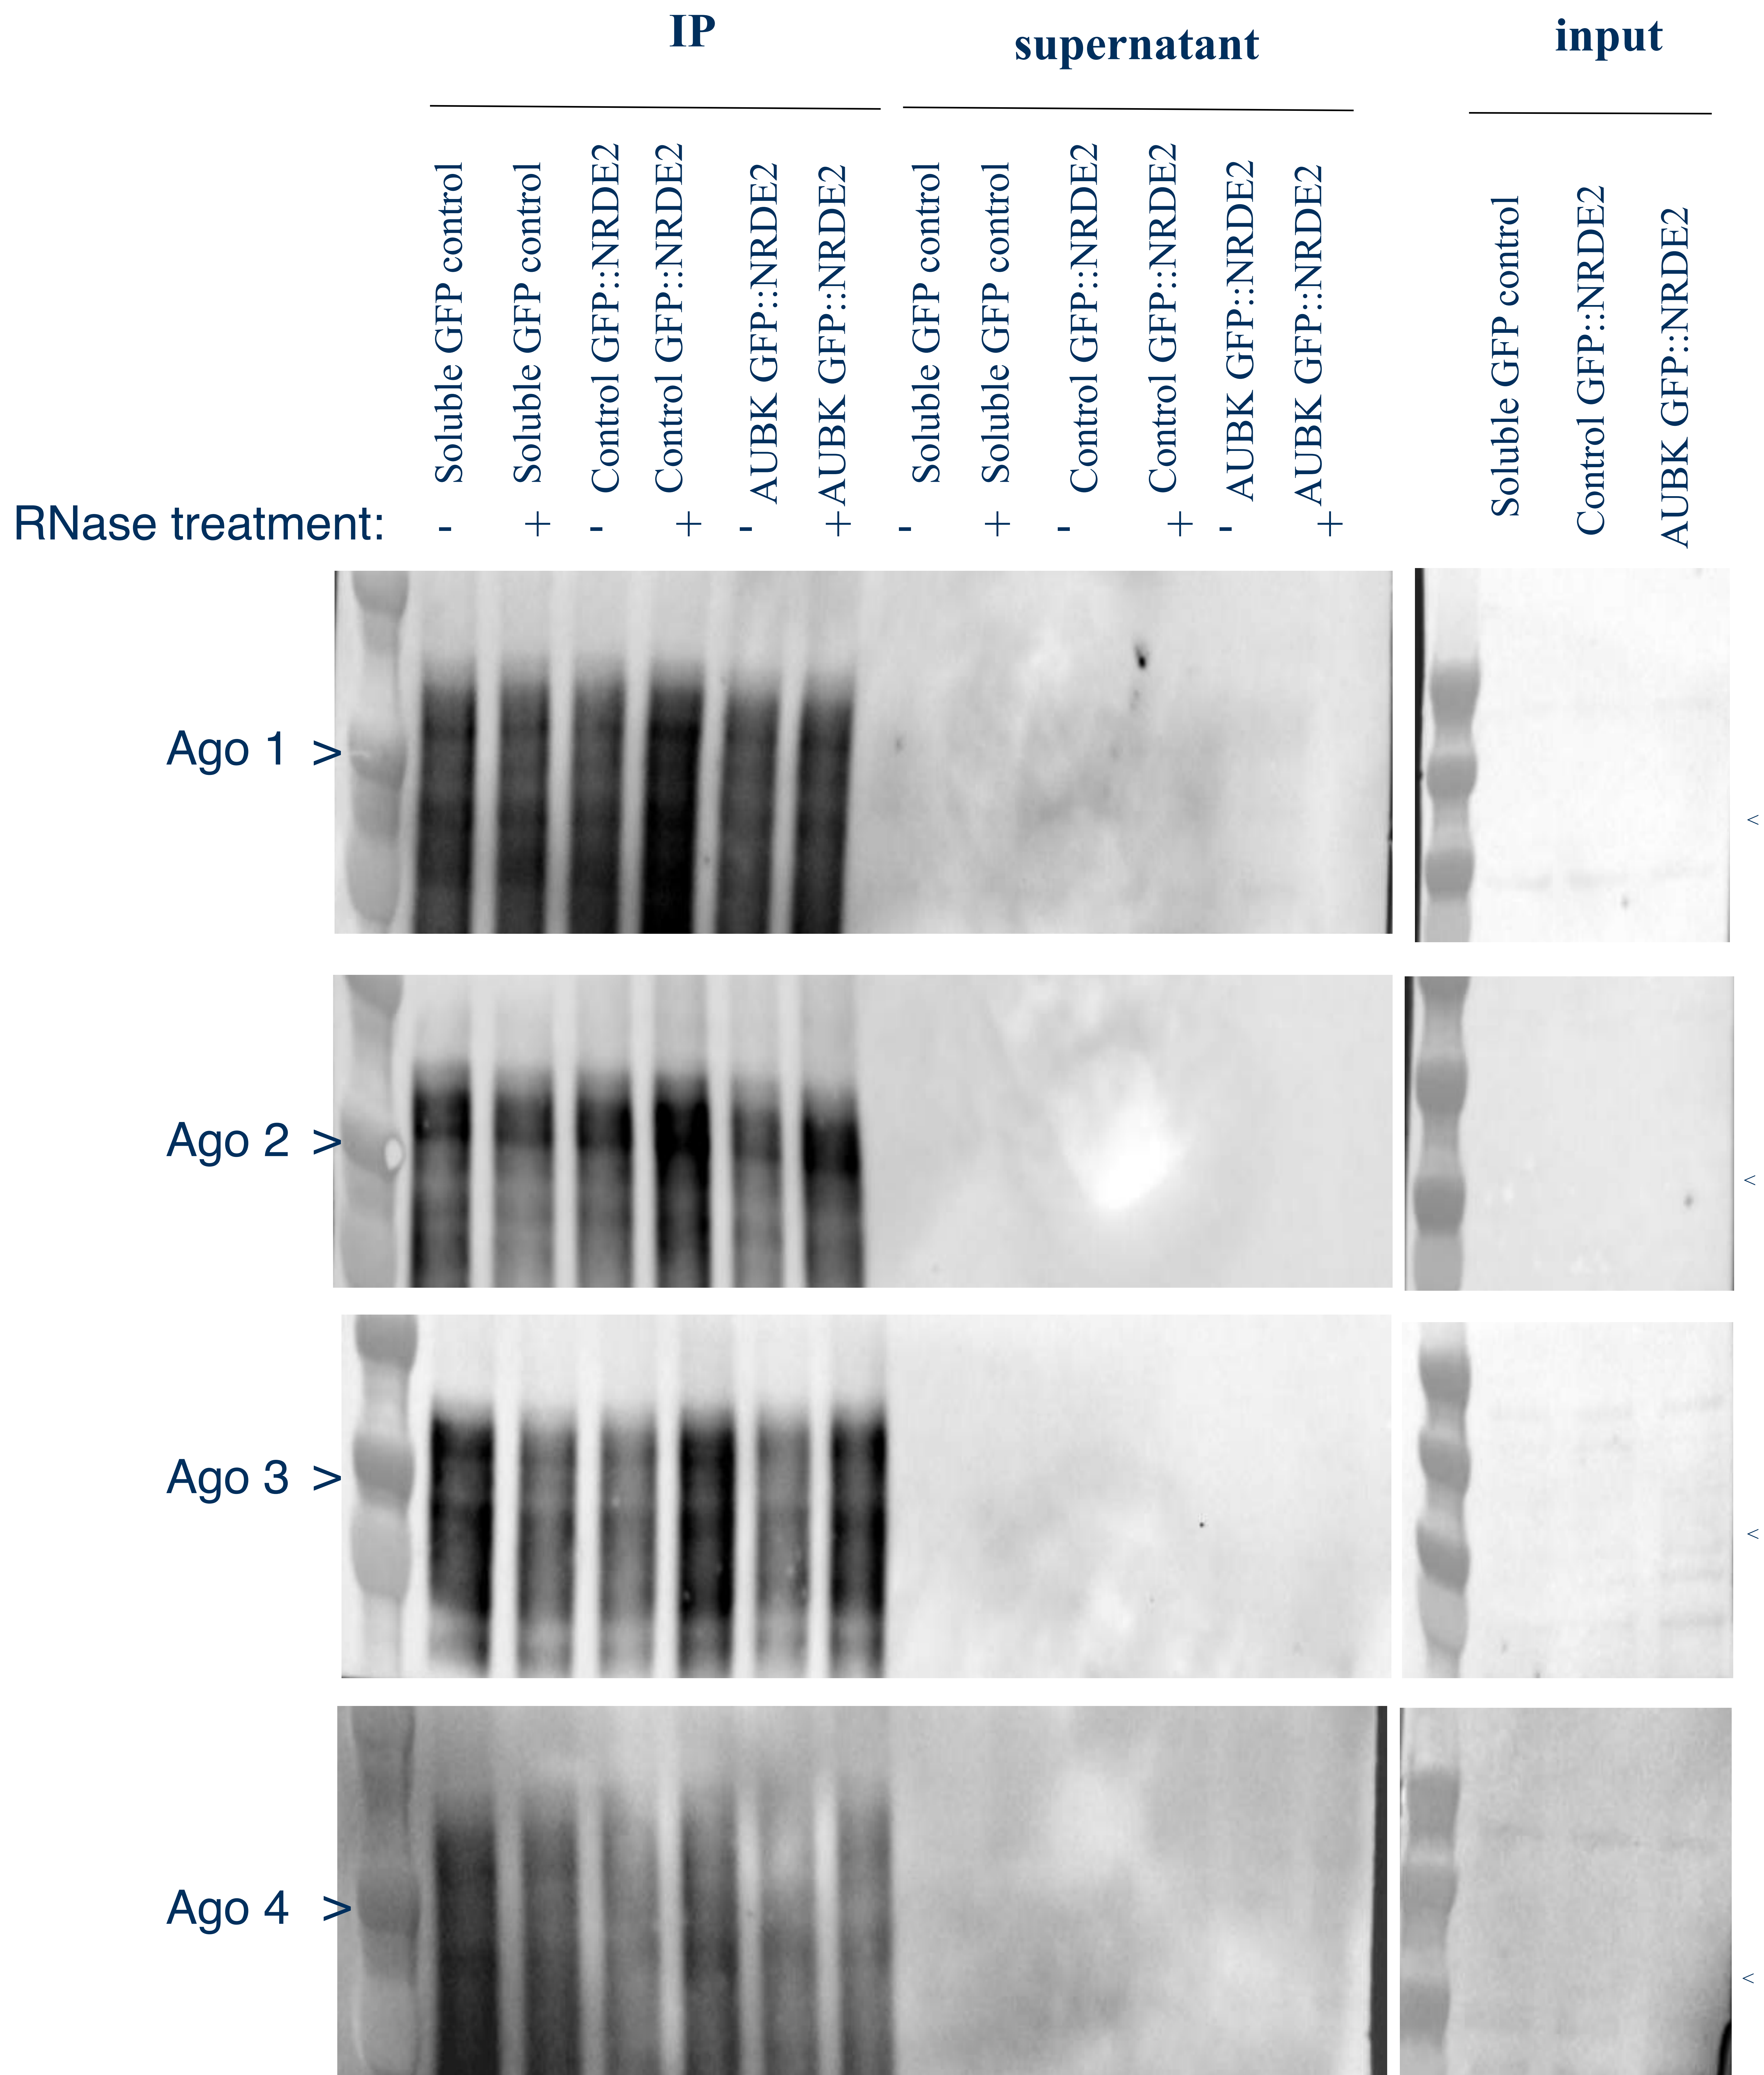

**Figure S6: NRDE-2 does not interact with the mammalian argonautes Ago 1,2,3 or 4.** Goat anti-GFP used to pull down eGFP::NRDE2 in MCF10A lysates in co-IP assay. Western blots against human Ago1-4 show no interaction with eGFP::NRDE2. Arrows point to 97kD, the expected size of each Ago protein.



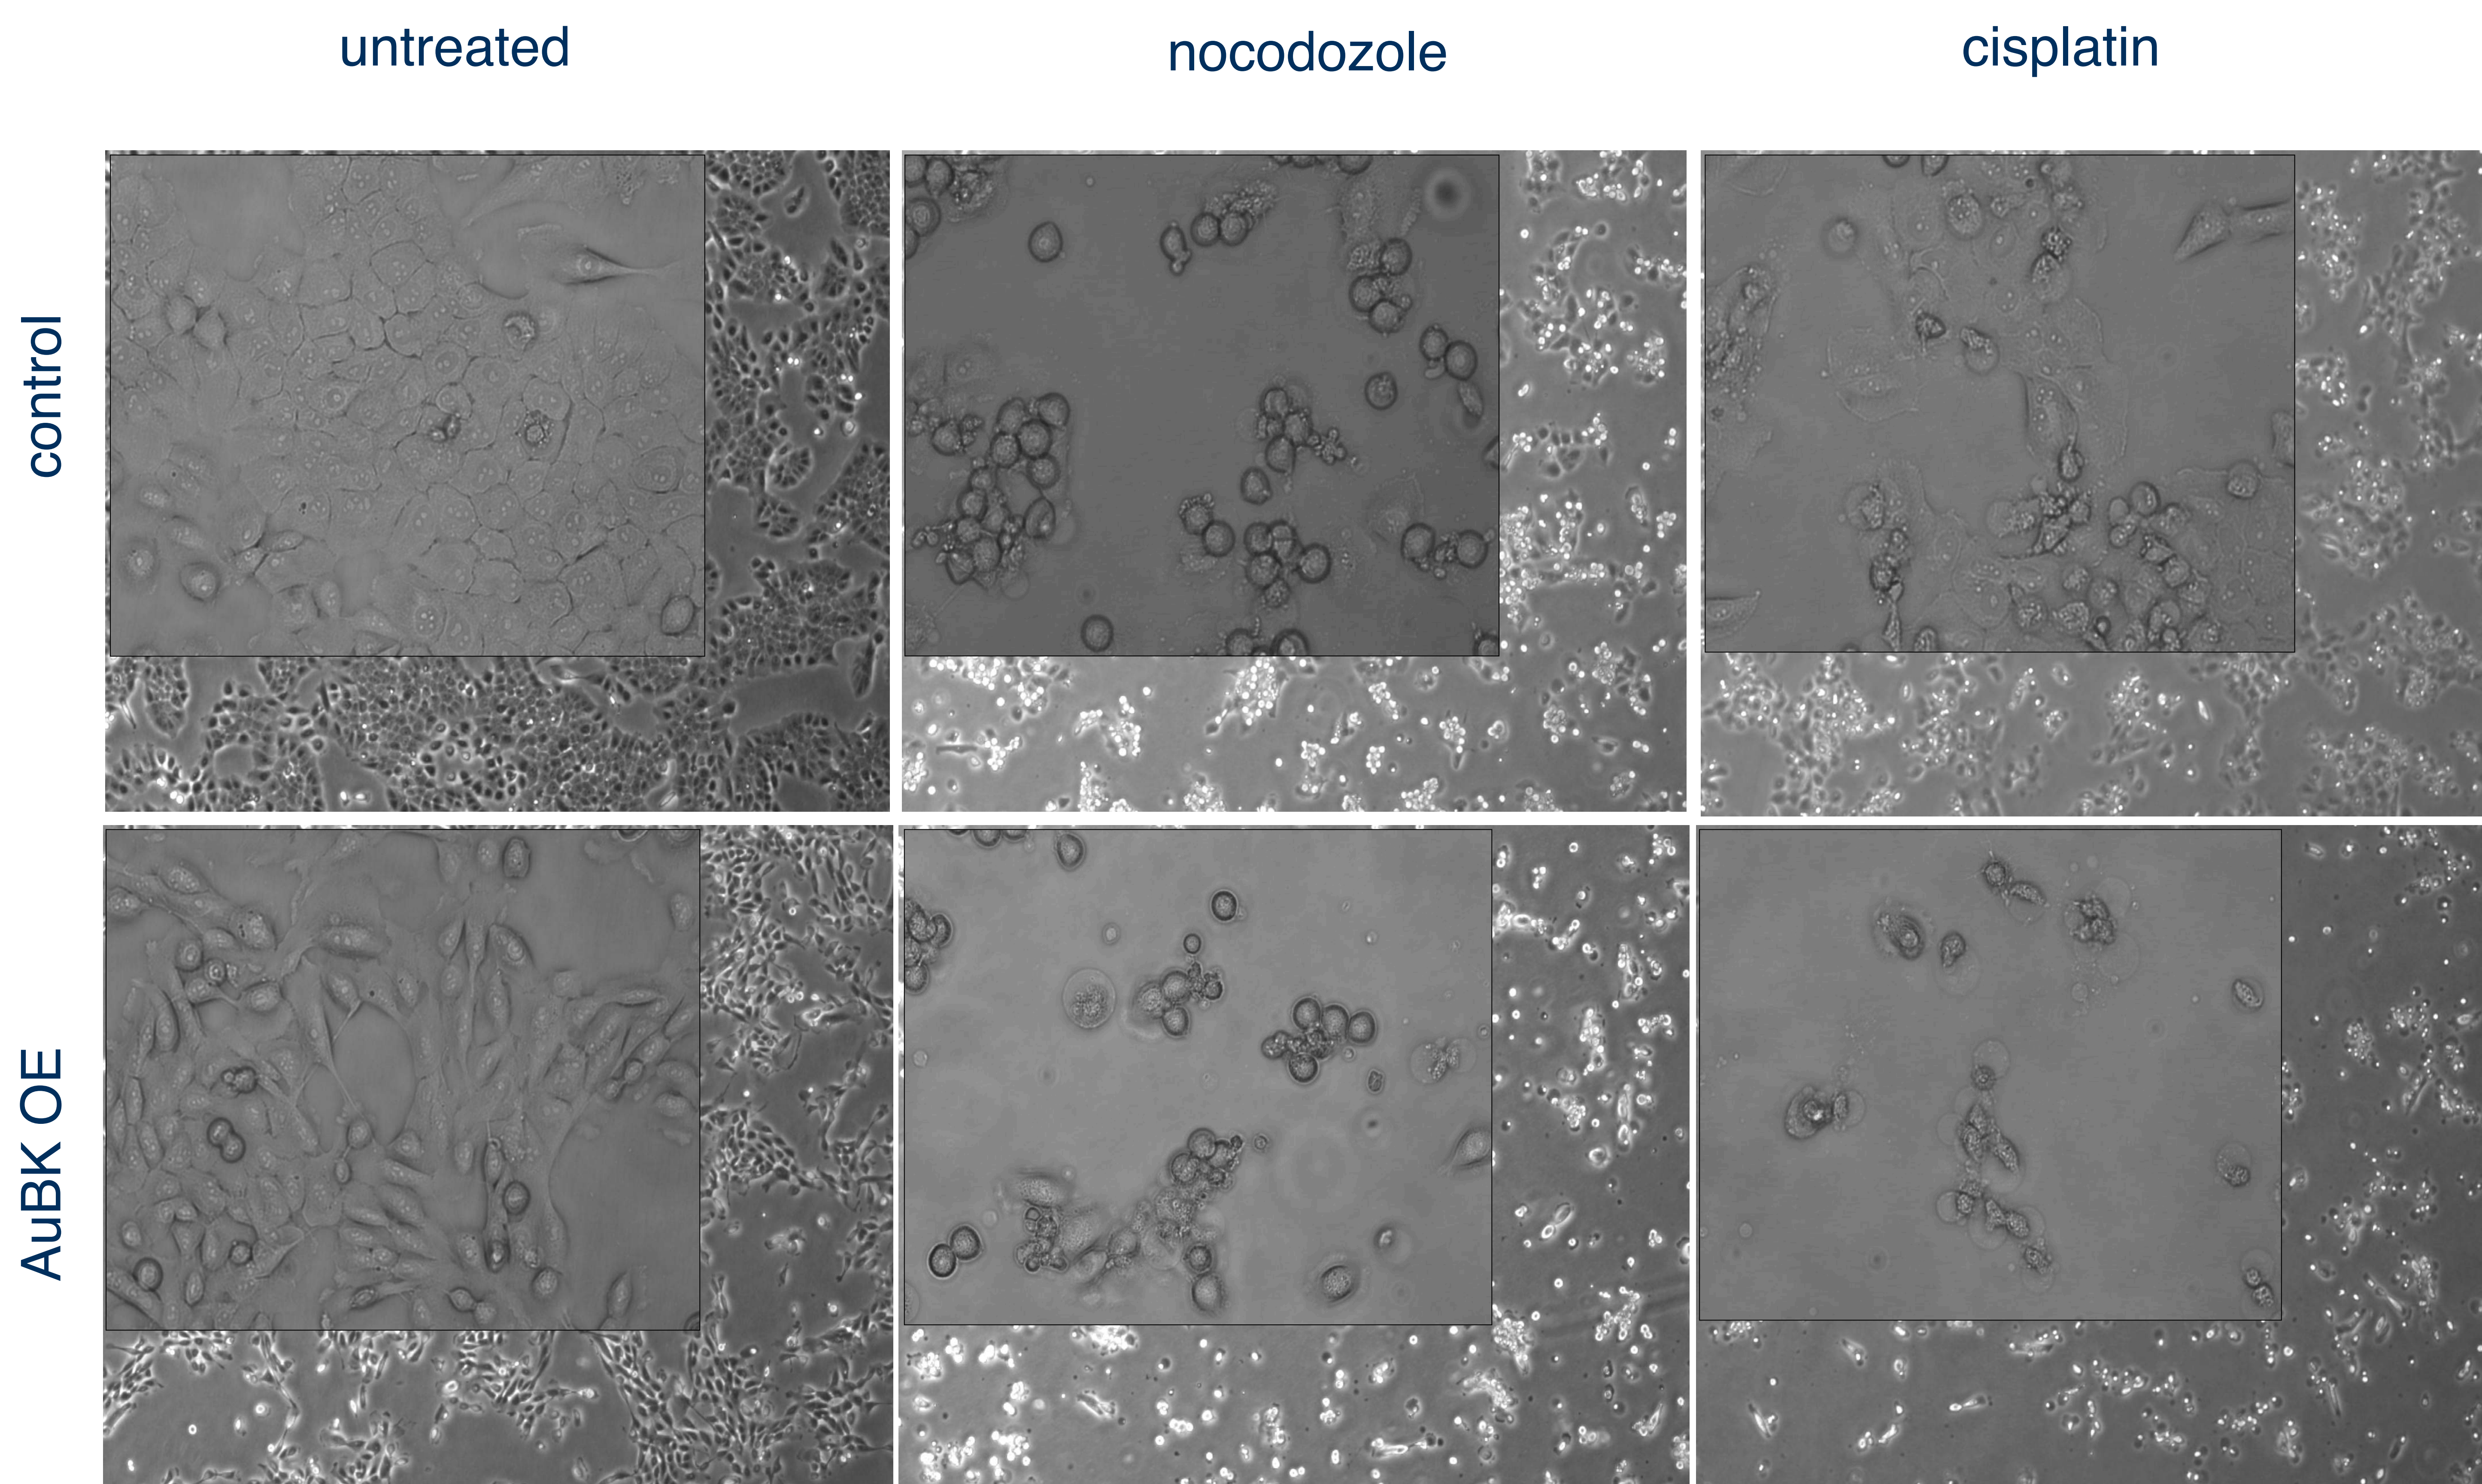

**Figure S7: Control and AuBK OE MCF10A cells treated with nocodozole show rounded morphology consistent with stall in G2/M. Cells treated with cisplatin show rounded, fragmented morphology, consistent with apoptosis.** Representative brightfield images of cells taken 16 hours after 0.1ug/ml nocodozole or 60uM cisplatin drug treatment with 4x objective and 20x objective (inset).
